## **Macrophage resilience and control of intracellular bacteria requires *sst1*-dependent integration of c-Myc, stress response and type I IFN pathways**

### **Authors:**

Bidisha Bhattacharya 1

Sujoy Chatterjee 1

Robert Berland 1,8

Alexander Pichugin 9

John Connor 3

Alexander Ivanov 4

Bo-Shiun Yan 5

Lester Kobzik 6

Igor Kramnik 1,2,3,7

1. The National Emerging Infectious Diseases Laboratory

2. Department of Medicine, Pulmonary Center

3. Department of Microbiology

Boston University School of Medicine

620 Albany Street, Boston, MA 02118

4. Department of Chemistry & Chemical Biology, Northeastern University

5. Institute of Biochemistry and Molecular Biology, National Taiwan University Medical College,

Taipei, Taiwan

6. Harvard T. H. Chan School of Public Health

7. Corresponding Author. E-mail: [ikramnik@bu.edu](mailto:ikramnik@bu.edu)

Present Addresses:

8. Department of Integrative Physiology and Pathobiology, Tufts University School of Medicine

9. Department of Cellular Immunology, Malaria Vaccine Branch, Walter Reed Army Institute of Research, 503 Robert Grant Ave, Silver Spring, MD 20910

## Abstract

The development of protective immunity vs immunopathology in tuberculosis is controlled by a mouse genetic locus, *sst1*, which mediates formation of human-like necrotic granulomas, but its molecular mechanisms have been unclear.

We demonstrate that *sst1* deficient macrophages develop aberrant, biphasic responses to TNF, characterized by super-induction of IFN $\beta$  and ISR pathways after prolonged TNF stimulation. This late stage was initiated by oxidative stress and driven by Myc via a JNK - IFN $\beta$  - PKR feed forward circuit. By locking the susceptible macrophages in a state of escalating stress, prolonged TNF stimulation reduces resilience to subsequent infection with intracellular bacteria.

We propose a generalizable paradigm in host - pathogen interactions, where susceptibility emerges gradually within inflammatory tissue due to imbalanced macrophage responses to growth, differentiation and stress stimuli prior to encountering pathogens. This explains how successful pathogens may locally bypass mechanisms of resistance in otherwise immunocompetent hosts and suggests novel therapeutic strategies.

## INTRODUCTION

Approximately one third of all humans are currently infected with the highly specialized human pathogen *Mycobacterium tuberculosis* (Mtb) and are at risk of developing clinical tuberculosis (TB). Most infected people, however, are resistant to the disease and do not transmit the bacteria. Nevertheless, Mtb remains highly successful at transmission because of its ability to induce cavitory necrotic lesions in the lungs of some individuals, who then spread the bacteria directly from person to person via aerosols. Necrotizing lung lesions are also the main cause of morbidity and mortality in immunocompetent TB patients, and thwart the efficacy of antibiotics. Thus, preventing or reversing the necrotic damage that Mtb causes to the lung would dramatically improve the efficacy of antibacterial therapies, decrease Mtb transmission and reduce the TB burden in human populations. However, the factors leading to the formation and progression of necrotic tuberculous lesions in the lungs of immune competent, but susceptible to TB individuals, remain largely unknown.

The *sst1* locus is a specific genetic determinant of intra-granulomatous necrosis identified in our laboratory using a unique mouse model of human-like necrotic pulmonary TB granulomas - the C3HeB/FeJ mouse strain[1, 2]. These mice develop large, well-organized necrotic granulomas after low dose infection with virulent Mtb, as opposed to standard C57BL6/J (B6) mice that develop compact solid lesions. Using QTL analysis, we mapped a total of nine genetic loci, of which only one locus (*sst1*) specifically controlled the necrotization of tuberculous granulomas[3, 4]. Congenic mice that carry the C3HeB/FeJ-derived *sst1* susceptibility allele (*sst1*S) on the resistant B6 background, B6-*sst1*<sup>C3H,S</sup>(B6-*sst1*S), also developed large, well-organized pulmonary necrotic granulomas 2 - 3 months after a low dose aerosol infection, even though these mice controlled Mtb replication within the first 6-8 weeks after infection similarly to the parental B6 mice[5]. The necrosis in the B6-*sst1*S TB lesions occurred with bacterial loads approximately 50-fold lower than in the parental C3HeB/FeJ mice indicating that extreme bacterial

loads did not drive the *sst1S*-mediated necrosis. These data demonstrated for the first time that mechanisms controlling Mtb-inflicted necrotic damage could be genetically uncoupled from the effector immune mechanisms controlling the bacterial load.

Subsequent experiments using the *sst1* congenic mice excluded T cell immune deficiencies and revealed that the *sst1* locus specifically controlled macrophage interactions with virulent Mtb and other intracellular bacterial pathogens –*Listeria monocytogenes*[6] and *Chlamydia pneumonia*[7]. Using a positional cloning approach, we have identified a variant of the interferon-inducible nuclear protein Sp110, *Ipr1* (intracellular pathogen resistance 1), as a strong candidate gene, whose expression is completely abolished in *sst1S* macrophages[8]. The human homologue of *Ipr1* - Sp110b - has been shown to play important roles in immunity to infections[9] and in control of macrophage activation[10]. However, the molecular mechanisms explaining the role of *sst1/Sp110* in the pathogenesis of TB and other infections remain to be elucidated.

Our goal was to dissect the molecular phenotype behind the observed dysfunction of *sst1S* macrophages underlying the necrotizing pathology. Focusing on this unique macrophage biology associated with susceptibility to multiple intracellular pathogens (Mtb, *Listeria*, *Chlamydia*) revealed a key role for aberrant responses of *sst1S* macrophages to TNF, a major cytokine required for formation and maintenance of TB granulomas[11] and for normal innate immune responses to many infectious agents. Compared to the wild type, TNF stimulation of the *sst1S* congenic macrophages induced a complex cascade beginning with hyperactivity of type I interferon (IFN-I) and proteotoxic stress pathways, and culminating with an escalating integrated stress response (ISR). We delineated the hierarchy and mechanisms driving this cascade and demonstrated its role in dysfunction of innate defenses against intracellular bacterial pathogens *in vitro* and *in vivo*. These findings delineate a common mechanism of susceptibility to several intracellular bacterial pathogens and suggest a novel disease-modifying therapeutic strategy.

## RESULTS

### **TNF triggers super-induction of IFN $\beta$ , and hyperactivity of type I interferon (IFN-I) and proteotoxic stress pathways in *sst1S* macrophages**

Previously we have reported that B6-*sst1S* mice infected with *Chlamydia pneumoniae* (*C.p.*), as well as their bone marrow-derived macrophages (BMDMs) infected with *C.p.* in vitro, produce higher levels of IFN $\beta$ [7]. This was associated with increased death of infected macrophages in vitro, which could be reduced using IFN receptor (IFNAR) blocking antibodies. To start dissecting mechanisms behind the upregulated IFN $\beta$  production, we compared IFN $\beta$  secretion by the B6wt and B6-*sst1S* BMDMs, stimulated either with a classical IFN $\beta$  inducer poly(I:C) or TNF (which induces low levels of IFN $\beta$  in B6 macrophages[12]). The B6-*sst1S* macrophages secreted higher levels of IFN $\beta$  protein in response to both stimuli (**Suppl.Fig.1A and Fig 1A**, respectively). Next, we compared the kinetics of TNF-induced IFN $\beta$  mRNA expression in B6wt vs B6-*sst1S* BMDMs. Initially, TNF induced similarly low levels of IFN $\beta$  mRNA expression in both cell types. Then, while IFN $\beta$  levels remained relatively stable in B6wt macrophages, in the B6-*sst1S* cells the IFN $\beta$  mRNA expression significantly increased between 8 - 24 h, such that the strain difference in IFN $\beta$  mRNA levels reached 10-20-fold by 24 h (**Fig.1B**). In addition, the B6-*sst1S* macrophages stimulated with TNF expressed significantly higher levels of the interferon-stimulated gene *Rsd2* (**Suppl. Fig.1B**), whose up-regulation was significantly reduced (by 70-75%) in the presence of IFNAR1 blocking antibodies, thus, confirming IFN-I pathway activation in the B6-*sst1S* cells (**Suppl.Fig.1C**). The IFN $\beta$  and *Rsd2* mRNA expression kinetics demonstrated that the bias towards IFN-I pathway activation in the B6-*sst1S* macrophages occurred at a later stage of persistent stimulation with TNF.

A previous report demonstrated that in wild type B6 macrophages, TNF stimulated low levels of IFN $\beta$  via NF-kB-mediated induction of IRF1, followed by auto-amplification by secreted

IFN $\beta$  via the IFN-I receptor and IRF7[12]. In our model, the IRF1 protein was similarly upregulated by TNF in both B6wt and B6-*sst1S* mutant macrophages (**Fig.1C**). To determine which of the IRF transcription factors might play a dominant role in the IFN-I pathway hyper-activation observed in the *sst1* susceptible macrophages, we performed knockdowns of IRF1, IRF3 and IRF7 prior to stimulation of BMDMs with TNF using siRNAs (**Fig.1C** and **Suppl. Fig.1D and 1E**). IFN $\beta$  mRNA was measured at 16 h of TNF stimulation. The IRF1 knockdown had the most pronounced effect (**Fig.1D**). However, it reduced the IFN $\beta$  expression proportionally in both strains and did not eliminate the strain difference. Compared to IRF1, the IRF3 and IRF7 knockdowns had weaker effects on the IFN $\beta$  mRNA expression and also proportionally reduced the IFN $\beta$  mRNA levels in both wt and mutant macrophages (**Fig.1D**). The IFNAR1 blocking antibodies were ineffective in preventing the late phase IFN $\beta$  upregulation in the B6-*sst1S* cells, when added after 8 hr of TNF stimulation (**Fig.1E**). Hence, the *sst1* locus neither acted by effects on the canonical TNF - IRF1 - IFN $\beta$  axis, nor did it control the IFN $\beta$  - IFNAR1 - IRF7 – IFN $\beta$  auto-amplification loop, described in the B6wt macrophages[12]. Although, all of those factors clearly contribute to *sst1*-independent, TNF-induced IFN $\beta$  expression in the *sst1S* macrophages as well.

To identify pathway(s) specifically responsible for the late stage super-induction of IFN $\beta$  in the B6-*sst1S* macrophages, we used small molecule kinase inhibitors. We added these agents after 12 h of TNF stimulation, and measured the IFN $\beta$  mRNA levels four hours later (**Fig.1F**). Strikingly, inhibiting JNK completely eliminated the *sst1*-dependent difference: JNK inhibitor SP600125 reduced the IFN $\beta$  mRNA expression in the B6-*sst1S* macrophages to the level of B6, but did not affect the IFN $\beta$  expression level in B6 macrophages. In contrast, NF- $\kappa$ B inhibitor (BAY11-7082) proportionally reduced the IFN $\beta$  mRNA levels in both wt and mutant macrophages (**Fig. 1F**). These observations suggest that the late phase super-induction of IFN $\beta$  in the *sst1*-susceptible macrophages following 12 h of TNF stimulation is a result of cooperation of the

canonical *ssf1*-independent TNF - NF- $\kappa$ B - IRF1 pathway with JNK-mediated pathway(s), presumably activated by stress, as detailed below.

To gain deeper insight into *ssf1*-mediated transcriptional regulation at this critical period, we compared transcription factor (TF) activities in B6 and B6-*ssf1*S macrophages following 12h of TNF stimulation using a TF activation array (Signosis). The activities of NF- $\kappa$ B, AP1, STAT1, GAS/ISRE, IRF, NFAT, NFE2, CREB, YY1 and SP1 were upregulated by TNF to a similar degree in the wt and mutant macrophages, while the HSF1 and MYC consensus sequence binding was significantly upregulated only in the mutant cells (**Fig.2A**). The higher TF activity of Myc in TNF-stimulated B6-*ssf1*S macrophages was confirmed using EMSA (**Fig.2B**). Next, we demonstrated higher levels of c-Myc protein in the nuclei of TNF-stimulated macrophages using Western blot. Notably, the levels of nuclear c-Myc decreased between 8 and 12 hours of TNF stimulation in the B6wt macrophages, while in the *ssf1*-susceptible cells nuclear c-Myc remained at elevated levels at 8, 12, and 16h after initial TNF stimulation (**Fig.2C**). Next, we tested whether increased c-Myc activity in susceptible macrophages explained increased IFN $\beta$  transcription. Indeed, knockdown of c-Myc using siRNA significantly reduced IFN $\beta$  mRNA expression (**Fig 2D**). The small molecule inhibitor of Myc-Max dimerization 10058-F4, which suppresses E box - specific transcriptional activation by this heterodimer, i.e. targets promoter-specific TF activity of c-Myc, potently suppressed TNF-induced IFN $\beta$  and *Rsad2* mRNA expression (**Fig.2E**). Myc can also promote activity of transcriptionally active genes independently of its binding to specific promoters[14, 15]. Therefore, we tested whether the inhibitor of positive transcription elongation factor (p-TEFb) flavopiridol or the RNA Pol II inhibitor of transcriptional elongation triptolide could also inhibit the IFN $\beta$  super-induction and found that both of them were inactive (**Fig.2E** and **Suppl. Fig. 1F**). In contrast, the Brd4 inhibitor JQ1, which has been previously shown to directly suppress c-Myc and IFN $\beta$  transcription[16], was active in our model as well (**Fig.2E**). In addition to transcriptional activation, c-Myc is also known to suppress a number of specific targets. Among those, cyclin-



dependent kinase inhibitor p21<sup>Cip</sup> plays an important role in the regulation of inflammation, monocyte differentiation, anti-oxidant response and the suppression of IFN $\beta$  gene expression[17-20]. We found that levels of p21<sup>Cip</sup> were significantly reduced in susceptible macrophages during the late phase of TNF response, as compared to the wild type cells (**Fig.2F**). These data demonstrate that the susceptible phenotype is associated with persistence of c-Myc activity during response to TNF, which significantly contributes to the IFN-I pathway hyperactivation.

In parallel, we observed escalating heat shock stress response in TNF-stimulated B6-sst1S macrophages, which is consistent with increased HSF1 activity, as determined using TF Array (**Fig.2A**). First, we confirmed the increase in HSF1 activity by demonstrating the upregulation of its transcriptional targets heat shock protein Hspa1a and Hspa1b mRNA in B6-sst1S macrophages stimulated with TNF for 24 h (**Suppl.Fig.2A**). Next, we followed the kinetics of Hspa1a protein expression and observed that initially TNF stimulation induced the heat shock stress response in both wt and mutant macrophages. However, in the wild type cells this stress response was moderate and did not escalate past 12 h, while in the susceptible cells it significantly increased between 12 and 16 h of TNF stimulation (**Fig.2G**). Taken together, the HSF1 TF activation and heat shock protein induction by TNF are indicative of proteotoxic stress (PS). The HSF1 inhibitor KRIB11, which blocks HSF1 activity, induced death of TNF-stimulated macrophages irrespective of their *sst1* genotype (**Suppl.Fig.2B**), demonstrating that, initially, PS was experienced by TNF stimulated macrophages of both backgrounds and the HSF1-mediated stress response was an important survival pathway. However, escalation of PS past 12h was characteristic of the susceptible macrophages. Of note, inhibition of TNF, c-Myc or JNK at 12 h did not prevent the PS escalation at the late phase of TNF response (**Fig.2H**), demonstrating that the incipient stress developed earlier and the PS transition to the overt phase did not require additional signaling. In contrast, the IFN $\beta$  escalation during this period still required TNF and JNK signaling (**Figs.1E and 1F**), indicating that greater PS/HSF1 pathway activation in *sst1S*

macrophages by TNF occurred either in parallel or upstream of the IFN $\beta$  pathway. Indeed, PS is known to induce JNK activation that is a driving force behind the IFN $\beta$  super-induction seen in our model. Remarkably, another HSF1 inhibitor that, in addition to blocking HSF1, also reduces protein translation, RHT[13], not only suppressed Hspa1a mRNA expression without killing macrophages, it also eliminated the difference between the wt and sst1S macrophages, when added 2h after TNF stimulation(**Suppl.Fig.2C**). Taken together, these data demonstrate an aberrant response of the sst1S macrophages to TNF, characterized by imbalance of major regulators of basic cell functions, such as increased activity of c-Myc, decreased p21 protein expression and escalating proteotoxic stress, that contribute to super-induction of the type I IFN pathway.

### **TNF triggers an Integrated Stress Response (ISR) and pro-apoptotic program in sst1S macrophages**

#### *Integrated stress response (ISR) after prolonged TNF stimulation of sst1S macrophages.*

To explore functional consequences of aberrant macrophage activation and more broadly characterize effects of the sst1 locus on the late response of primary macrophages to TNF, we compared transcriptomes of B6 and B6-sst1S BMDMs after 18 h of stimulation with TNF (10 ng/ml). While no significant differences were detected in naive macrophages, the gene expression profiles of TNF-treated cells diverged substantially with 492 genes differentially expressed at  $p < 0.001$  (**Table in Fig.3A**). The most prominent differentially expressed cluster was composed of genes that were selectively upregulated by TNF in B6-sst1S, but not B6wt macrophages (**Fig.3A**). Using Gene Set Enrichment Analysis (GSEA) we found significant enrichment for the type I interferon-regulated genes in sst1S macrophages responding to TNF. Genes involved in nuclear RNA processing and nucleo-cytoplasmic transport were also upregulated by TNF in sst1S

macrophages. Strikingly, multiple biosynthetic pathways were coordinately downregulated in TNF-stimulated sst1S macrophages, including lipid and cholesterol biosynthesis, protein translation, ribosome, mitochondrial function and oxidative phosphorylation. Significant upregulation of Hspa1a and Hspa1b along with IFN $\beta$  and typical IFN-I-inducible genes Rsad2 (viperin) and Ch25h confirmed our previous observations of PS and IFN-I hyperactivity. Further validation of the differential gene expression using quantitative real time RT-PCR (qRT-PCR), demonstrated up-regulation of a number of other pathogenically important genes, such as IL-10, Mmp-13, IL-7R, Death Receptor 3 (Dr3/Tnfrsf12), transcription factors Bhlh40 and Bhlh41 (**Fig.3B**).

A group of genes (Atf3, Chop10, Ddit4, Trib3 and Chac1) induced during integrated stress responses (ISR) was significantly enriched among the upregulated genes (**Fig.3B**). The ISR is known to be induced as a result of the inhibition of cap-dependent translation caused by phosphorylation of eIF2 $\alpha$  by several protein kinases activated in response to various stresses: viral infection (PKR), ER stress (PERK), starvation (GCN2), oxidative stress and hypoxia (HIPK)[23]. The most upregulated genes, Trib3 and Chac1, are known targets of a transcription factor Chop10 (Ddit3), which is activated downstream of the ISR transcription factors ATF4 and ATF3[21, 22]. To determine whether the induction of Trb3 and Chac1 mRNAs in the B6-sst1S macrophages by TNF was indeed downstream of eIF2 $\alpha$  phosphorylation, we treated B6-sst1S BMDMs with a competitive eIF2 $\alpha$  phosphorylation inhibitor ISRIB[24]. The ISRIB treatment significantly reduced the Trb3 and Chac1 mRNA upregulation, thus confirming their specific induction by ISR in our model. However, ISRIB had no effect on IFN $\beta$  mRNA level (**Fig.3D**). In contrast, addition of the ROS scavenger BHA immediately after TNF stimulation inhibited both ISR and IFN $\beta$  gene expression, indicating that both pathways developed in response to oxidative stress (**Fig.3C**). Indeed, ROS are known to cause protein misfolding and aggregation in cytoplasm and ER. The levels of ROS produced by TNF-stimulated B6wt and B6-sst1S macrophages were

similar (**Suppl.Fig.2D**) suggesting that those cells may differ in responses to ROS-mediated stress. Hence, we used Trb3 and Chac1 mRNA expression as biomarkers of ISR to interrogate mechanisms of the ISR activation and maintenance in sst1S macrophages during the course of TNF stimulation.

### *Bi-phasic regulation of the Integrated Stress Response*

First, we compared the mRNA kinetics of genes representing transcriptional targets of the ISR (Chop10, Atf3, Ddit4, Chac1 and Trb3). The expression of the ISR genes spiked in the B6-sst1S cells at 16 h and continued to increase further between 16 - 24 h (**Fig.4A**). Next, we monitored the expression of ISR markers ATF4, ATF3 and GADD34 at the protein level by Western blot. Initially, we observed similar induction of ATF4 and ATF3 after 3 h of TNF stimulation in both the B6wt and B6-sst1S BMDMs. However, in the B6 cells the levels of ATF4 and ATF3 proteins declined to basal levels by 15 and 24 h, respectively. Meanwhile, in the susceptible macrophages they remained elevated. The ATF3 levels even increased during the 16 - 24 h interval (**Fig.4B**). Thus, the sst1 susceptibility allele is associated with ISR escalation after 12hrs of TNF stimulation, i.e. resembles its effect on IFN-I pathway suggesting a mechanistic link.

We followed the kinetics of the ISR- and IFN-inducible genes within a critical period between 8 and 14 hours at 2 h intervals. The IFN $\beta$  mRNA expression level in the B6-sst1S macrophages gradually increased, while the ISR markers remained at the same level throughout this period, suggesting a possible mechanistic hierarchy (**Fig.4C**). Therefore, we tested whether blocking IFN-I signaling reduced the ISR induction. The IFN type I receptor (IFNAR1) blocking antibodies were added at different times after stimulation with TNF (10 ng/ml), and the ISR was assessed at 16 h of the TNF stimulation (**Fig.4D**). Blocking the IFN-I signaling at 2 - 4 h after TNF stimulation profoundly suppressed the ISR escalation, as measured by Trb3 and Chac1 gene expression at 16 h of TNF stimulation. However, the effect of IFNAR blockade at later timepoints gradually declined and completely disappeared by 12 h. Blocking TNF signaling using neutralizing

antibodies affected the ISR induction in a manner very similar to the IFNAR blockade - it was effective at the earlier stages (2-4 h) and only partially efficient at 8 h (**Fig.4D**). Simultaneous blockade of both pathways at 8 h did not produce synergistic effect on ISR suggesting that both TNF and IFN were in the same pathway (**Suppl.Fig.3A**). The effect of ROS scavenger on ISR escalation dramatically declined by 8 h. Effects of the above inhibitors on ISR completely disappeared by 12 h (**Fig. 4D and Suppl.Fig.3B**). Therefore, once the TNF - IFN- and ROS-dependent ISR pathway was set in motion, the transition from latent to overt ISR during the 12 - 16 h period was driven in cell autonomous manner.

To reveal the driving force behind the ISR transition from the latent to overt phase, we treated B6-sst1S BMDM at 12 h after stimulation with TNF with inhibitors of eIF2 $\alpha$  phosphorylation ISRIB, ER stress inhibitor PBA[25], PKR inhibitor C16[26] and inhibitors of stress kinases p38 (SB203580) and JNK (SP600125) and measured the induction of Trb3 and Chac1 mRNAs at 16 h (**Fig.4E**). The ISRIB and PKR inhibitors profoundly inhibited expression of both sentinel mRNAs, while PBA had no effect suggesting that PKR activity was responsible for transition from latent to overt ISR in the B6-sst1S macrophages at the late stage. Indeed, PKR levels increased by the 12 h of TNF stimulation and were subsequently maintained at higher level in the B6-sst1S cells (**Fig.4F**). PKR is a classical interferon-inducible protein, whose kinase activity is induced by double-stranded RNA (dsRNA). Recently it has been demonstrated that PKR can interact with and be activated by small nucleolar RNAs and other misfolded and dimerized endogenous RNA molecules [27, 28]. Using dsRNA-specific antibodies J2[29], we detected dsRNA speckles in the cytoplasm of TNF-stimulated BMDM of both B6 and B6-sst1S backgrounds (**Suppl. Fig.3C**). Thus, the presence of the endogenous PKR ligands may provide an explanation of how IFN-induced PKR is activated by TNF in non-infected macrophages.

Taken together, these data demonstrate that in sst1S macrophages ROS induced by TNF initiated a cascade of stress responses in biphasic manner. The early initiation phase (2 – 4 hrs) required ROS, leading to proteotoxic stress (PS), ER stress and ER stress-mediated ISR similarly

in both the wt and sst1S mutant macrophages. In support of this notion, XBP-1 splicing, known to be induced by Ire1 kinase activated specifically by the ER stress follows similar kinetics in both strains reaching peaks at 4 - 8 h (**Suppl. Fig.3D**). While self-limited in the B6wt cells, the ISR escalated in the B6-sst1S macrophages during the 12 - 16 h period of TNF stimulation in IFN-I-dependent manner via PKR activation, a pathway traditionally associated with antiviral immunity, but more recently also linked to metabolic dysregulation[30].

*TNF induces pro-apoptotic reprogramming in the sst1S macrophages.*

The major adaptive role of ISR is a global reduction of cap-dependent protein translation[21]. However, translation of many proteins involved in stress responses proceeds via cap-independent mechanisms and the proportion of those proteins in the cellular proteome increases during prolonged stress. Thus, we postulated that an unrelenting stress in B6-sst1S macrophages would result in global proteome remodeling, and discordance between transcriptome and proteome. Indeed, we detected upregulation of Trb3 protein at the early stage of TNF stimulation, but not during the second phase of ISR escalation in B6-sst1S macrophages, despite high levels of its mRNA induction (**Fig.5A**). Therefore, we compared global quantitative protein abundance profiles of the B6wt and B6-sst1S mutant macrophages after stimulation with TNF, using stable isotope labeling of the digested macrophage proteomes with tandem mass tags (TMT) followed by deep 2-D LC-MS/MS-based proteomic analysis.

The proteome profiles of TNF-stimulated B6-sst1S and B6wt macrophages were clearly distinct. A number of proteins were up-regulated in the susceptible macrophages demonstrating the absence of a total translational arrest in the mutant cells. In agreement with our previous observations, higher levels of ATF3 and Hspa1a proteins were detected by the proteomic analysis. We also observed that the TNF-stimulated mutant sst1S cells expressed higher levels of proapoptotic proteins DAXX and Bim, cold shock-inducible RNA binding protein Rbm3 and

dsRNA-binding protein Stauphen1. We confirmed the upregulation of DAXX and Bim by Western blot (**Fig.5B and C**).

Only the B6wt cells expressed the Sp110/lpr1 protein encoded within the sst1 locus. lpr1 has been identified and validated as a strong candidate gene in our previous work using positional cloning[8]. The lpr1 protein was present in proteome of both non-stimulated and, at higher levels, of TNF-stimulated B6 macrophages. We extended these observations by finding that the lpr1 protein was induced in B6wt macrophages between 8 and 12 h after initial TNF stimulation, corresponding to a period of late stress escalation in the lpr1-negative B6-sst1S cells (**Fig.5D**). JNK inhibition or IFNAR blockade prevented the lpr1 protein up-regulation by TNF demonstrating that it is an interferon- and stress-inducible protein (**Fig.5F**). The TNF-stimulated B6 macrophages also expressed higher levels of proteins involved in antioxidant defenses and protein homeostasis in ER and cytoplasm: 1) NADH-cytochrome b5 reductase 4 (CYB5R4) which protects cells from excess buildup of ROS and oxidant stress[31]; 2) Stromal cell-derived factor 2 (SDF2), involved in ER protein quality control, unfolded protein response and cell survival under ER stress[32]; 3) The signal sequence receptor 2 (SSR2), a subunit of the ER TRAP complex involved in protein translocation across the ER membrane[33]; 4) Stress-associated endoplasmic reticulum protein 1 (SERP1) which interacts with target proteins during their translocation into the lumen of the endoplasmic reticulum and protects unfolded target proteins against degradation during ER stress[34]. In addition, the B6 macrophages expressed higher levels of 7-dehydrocholesterol reductase (Dhcr7), a key enzyme in cholesterol biosynthesis. We confirmed this observation using Western blot and determined that the difference was due to the down-regulation of Dhcr7 in the B6-sst1S macrophages 12 - 16 h of TNF stimulation (**Fig.5E**). This effect might be explained by the inhibitory effect of 25-hydroxycholesterol on cholesterol biosynthesis via SREBP2 inhibition[35]. This oxidized cholesterol derivative is produced by the IFN-I -inducible enzyme Ch25h (cholesterol 25-hydroxylase)[36], which is highly upregulated in the B6-sst1S macrophages by TNF in an IFN-I-dependent, but ISR-independent manner. Thus, hyperactivity

of IFN-I pathway in the *sst1*-susceptible macrophages leads to pro-apoptotic proteome remodeling via up regulation of PKR - ISR-mediated pathway, and, possibly, broader down regulation of metabolic pathways, such as cholesterol biosynthesis, via effects of other interferon-stimulated proteins. In contrast, the proteome of B6wt macrophages stimulated with TNF is enriched for proteins countering oxidative and ER stress and supporting survival.

### **TNF priming modifies susceptibility of the *sst1S* macrophages to infections in vitro.**

In vivo, monocytes are recruited to and undergo terminal differentiation within inflammatory milieu, where they will encounter cytokines prior to interaction with infectious agents. The above data suggested that pre-exposure of macrophages to TNF may profoundly affect their subsequent interactions with various pathogens, not only Mtb. Therefore, we tested whether pre-treatment of B6 and B6-*sst1S* macrophages with TNF differentially affected their interactions with another intracellular bacterial pathogen, *Francisella tularensis* Live Vaccine Strain (F.t. LVS). Following overnight pretreatment with 10 ng/ml of TNF, the death rate of the infected B6-*sst1* macrophages increased at various MOIs (**Fig.6A**). It was significantly higher in the B6-*sst1* background, as compared to B6wt (**Fig.6B**). The bacterial loads also increased in TNF pre-treated susceptible macrophages (**Fig.6C**) suggesting that stress compromised their anti-bacterial resistance. Assessing the levels of IFN $\beta$ , *Rsad2* and stress mRNAs in macrophages, either pretreated with TNF or naïve, we determined that TNF treatment made a major contribution to IFN and stress pathways induction, as compared to the bacteria alone (**Fig.6D**).

To assess the impact of individual stress pathways on the LVS-infected macrophage survival and bacterial control, we pre-treated B6-*sst1S* BMDMs with TNF in the presence of small molecule inhibitors and then infected them with *F.t.* LVS at MOI 1:1 and 3:1. In this experiment, TNF and inhibitors were present for the duration of infection (24h), as opposed to short stage-specific pulses of inhibitors used in previous experiments. This modification was introduced to



allow detection of integrated effects of inhibitors on cell survival and bacterial control. First, we determined that inhibitors of ROS (BHA), p38, c-Myc, as well as IFNAR blocking antibodies, significantly reduced percentage of PI positive cells (**Fig.6E**) and prevented cell death (**Fig.6F**). However, the ISR inhibitor ISRIB and, to a lesser extent JNK and PKR inhibitors aggravated the susceptible phenotype, as evidenced by significant decrease of total and viable cell numbers after infection (**Fig.6F**). This observation points to compensatory roles of JNK and ISR stress pathways activation in the susceptible background, i.e. they function to improve cell survival. Therefore, those inhibitors were excluded from subsequent experiments, in which we studied effects of inhibitors on the bacterial control. As above, B6-*sst1S* BMDMs were treated with TNF in the presence of individual ROS, p38, c-Myc inhibitors and IFNAR blocking antibodies, as well as their pairwise combinations. Remarkably, the c-Myc inhibitor significantly reduced, while the IFNAR1 receptor blockade increased, the bacterial loads in TNF treated B6-*sst1S* macrophages, while ROS and p38 inhibitors were neutral in this respect (**Fig. 6G**). In pairwise combinations, c-Myc and p38 inhibitors improved the bacterial control and increased macrophage survival (**Figs.6G and 6H**, respectively). Also, the c-Myc, but not the p38, inhibitor could overcome detrimental effect of the IFNAR blockade on the bacterial replication. Overall, our data demonstrate that pre-exposure of B6-*sst1S* macrophages to TNF prior to infection with virulent intracellular bacteria (*F.t.* LVS is virulent in mice) in vitro, compromises infected macrophage survival and bacterial control via the same mechanisms that underlie TNF-induced stress: in agreement with our previous data demonstrating that Myc hyperactivity mechanistically is upstream of other manifestations of aberrant activation in B6-*sst1S* macrophages, inhibition of Myc transcription factor activity uniquely improved both macrophage survival and bacterial control.

### **The *sst1* locus regulates outcome of infection with *F. tularensis* LVS in vivo**

To assess the impact of the *sst1* locus in vivo, we infected the *sst1* resistant and susceptible congenic mice via respiratory route with 1000 CFU of *F.t.* LVS. The survival of the

*sst1* susceptible mice was significantly lower as compared to the *sst1*-resistant congenic mice (**Fig.7A**). Importantly, the bacterial replication was initially similar in the lungs, spleens and livers of both mouse strains. The bacterial loads, however, significantly diverged between days 5 and 11 reaching 100-fold higher levels in the organs of the *sst1* susceptible mice (**Fig.7B and Suppl. Fig. 4A**), which also developed extensive necrotic lung inflammation by that time (**Fig.7C and Suppl. Fig 4B**). Additional experiments were performed using *sst1* congenic *scid* mice also developed in our laboratory. Both the *sst1R scid* and *sst1S scid* mice succumbed to infections with 60 CFU of *F.t.* LVS. However, the survival time was shorter and the bacterial loads were 30-50-fold higher in the *sst1* susceptible *scid* mice (**Suppl. Fig.5A and 5B**) demonstrating that innate immune cells were responsible for the *sst1*-mediated phenotype *in vivo*.

FACS analysis of inflammatory cells isolated from the infected lungs of immune competent mice eight days post infection demonstrated similar proportions of CD4<sup>+</sup> and CD8<sup>+</sup> T cell populations and NK cells. The proportions of activated CD69<sup>+</sup> cells within those populations were also similar (**Table 1**). However, we detected a higher proportion of the IL-10 producing myeloid cells in the *sst1S* mouse lungs at that time, which is in agreement with the BMDM phenotype observed *in vitro* (**Fig.7D**). In addition, we observed substantial difference in the myeloid compartment (CD11b<sup>+</sup>), where the fraction of immature monocyte-like Ly6C<sup>+</sup>F4/80<sup>-</sup> cells was significantly higher in the lungs of the *sst1S* mice (11.2%), as compared to 5.3% in the B6 lungs. The ratio of the more mature (Ly6C<sup>+</sup>F4/80<sup>+</sup>) monocyte-derived macrophages to the immature (Ly6C<sup>+</sup>F4/80<sup>-</sup>) cells in the lungs of the *sst1S* mice was 1.1, as compared to 3.7 in the resistant ones (**Table 2**). These data imply either delayed maturation of the newly recruited inflammatory monocytes in the lungs of the *sst1S* mice and/or more rapid turnover of monocyte-derived macrophages during *F.t.* LVS infection *in vivo*, which would be consistent with their more rapid demise, as observed *in vitro*.

## Discussion.

Taken together, the complex cascade delineated in this study indicates that the *sst1*-mediated susceptibility to intracellular bacterial pathogens is mechanistically linked to an aberrant macrophage response to TNF triggering escalating stress responses. IFN type I plays an important intermediary role in this cascade, with its super-induction resulting from a synergistic effect of the canonical NF- $\kappa$ B-mediated TNF activation pathway and a *sst1*-specific response mediated by the stress kinase JNK. The origins of stress, however, are upstream of IFN-I and reflect hyperactivity of Myc in the setting of TNF-induced oxidative stress. Inhibition of either transcriptional activity of Myc or ROS generation prevented the late phase IFN-I super-induction and the escalation of the ISR in TNF-stimulated *sst1S* macrophages. Thus, we suggest that untangling stress-mediated regulation of Myc activity in myeloid cells is a key to understanding the *sst1* phenotype in vitro and in vivo.

While Myc activity is important for growth of myeloid precursors[37] and alternative macrophage activation in tumor microenvironment[38], down regulation of Myc activity in monocytes/macrophages appears to be an important adaptive mechanism within infection-induced inflammatory lesions. The inflammatory monocytes are produced from myeloid precursors in bone marrow and recruited from circulation to sites of inflammation, where they undergo final cell divisions and terminal differentiation. Prior to pathogen encounter, their phenotype is further sculpted by multiple factors within the inflammatory milieu, which include not only classic inflammatory mediators, but also growth factors, hypoxia, starvation, acidosis, etc. Sensing and integrating responses to gradients of those factors is necessary to balance cell metabolism, growth and macrophage effector functions within specific environments[39]. Indeed, in non-transformed cells, sensing stress can stop cell cycle progression and trigger terminal differentiation[40]. For example, stress kinases can stimulate p53 to block transcription of c-Myc and its targets[41]. Considering macrophage maturation within inflammatory lesions, this response may dramatically reduce energy expenditure and prepare macrophages for subsequent stress escalation and pathogen encounter. Indeed, we determined that Myc levels and

transcriptional activity was down regulated 12 hours after TNF stimulation, but only in the wild type macrophages. In contrast, the inability to repress Myc in TNF-stimulated susceptible macrophages is associated with escalation of proteotoxic stress (PS), possibly due to protein misfolding caused by ROS. Thus, persistent Myc activity appears to be a major driver of the maladaptive response of the *sst1*-susceptible macrophages, leading to un-resolving stress, accelerated death of infected macrophages and, eventually, to the development of overt necrotic pathology.

While specific mechanisms responsible for *sst1*-mediated regulation of Myc-controlled pathways remain to be elucidated, our studies revealed the dynamics of downstream cascade associated with the susceptible phenotype. At an early stage, TNF stimulation causes proteotoxic stress (PS) and integrated stress response (ISR) in both wild type and the *sst1*-susceptible mutant macrophages. At this stage the ISR is driven by the ER stress and unfolded protein response (UPR), as previously described[42]. The unusual, second wave of ISR activation is exclusive for the *sst1*-susceptible phenotype. It is initiated by TNF in IFN-I-dependent manner via PKR activation, similar to a cascade recently described in a model of *Listeria monocytogenes* infection[43]. However, in the *sst1*-susceptible macrophages, the IFN $\beta$  super-induction was triggered by TNF alone. We excluded a significant contribution of the STING – TBK1 - IRF3 pathway to the observed IFN $\beta$  super-induction and, thus, demonstrated that recognition of endogenous or exogenous nucleic acids was not required. Instead, the upregulation of the IFN-I pathway could be explained solely by a cooperative effect of prolonged activation of NF- $\kappa$ B and JNK pathways. Both pathways are known to converge on IFN $\beta$  enhancer and recruit coactivators and chromatin-remodeling proteins to form an enhanceosome[44, 45]. JNK is activated in response to oxidative, proteotoxic, metabolic and other challenges and is an important part of the cellular defense strategy against stress[46, 47]. Whereas transient JNK activation is adaptive, prolonged JNK activation is known to contribute to pro-apoptotic transition, which, as we show, in

TNF-stimulated *sst1*-susceptible macrophages occurs via type I IFN pathway upregulation and PKR activation.

We propose that stress-induced IFN-I pathway escalation mechanistically represents an intermediate step between a low grade constitutive IFN-I pathway activity that plays homeostatic role[48] and a full blown activation downstream of nucleic acid recognition receptors mediated by IRF3. Normally, it plays an adaptive role. For example, upregulation of JNK by proteotoxic stress induced by TNF may lead to transient activation of the IFN $\beta$  – PKR – ISR axis to limit global protein biosynthesis by inhibiting cap-dependent translation. However, un-resolving proteotoxic stress and persistent ISR observed in susceptible macrophages lead to further escalation of JNK activity, corresponding increase in IFN $\beta$  production and upregulation of interferon-stimulated genes PKR, *Rsad2* and *Ch25h*, whose products inhibit protein biosynthesis, mitochondrial function and lipogenesis, respectively[43, 49, 50]. The 25-hydrocholesterol produced by the *Ch25h* enzymatic activity can further increase ISR[51] and amplify inflammatory cytokine production[52]. Moreover, by limiting cholesterol biosynthesis it can sustain elevated IFN-I signaling[53]. Previously, PKR has been shown to stimulate JNK activity in macrophages [30]. Possibly, this occurs via translational arrest, since other protein synthesis inhibitors also activate stress kinases JNK and p38 via a mechanism known as the "ribotoxic stress response"[54, 55]. Thus, it appears that at certain levels JNK, IFN $\beta$  and PKR may form a feed forward stress response circuit, locking TNF-stimulated *sst1*-susceptible macrophages in a state of unrelenting stress and, eventually, leading to suppression of essential metabolic pathways, IFN-I-dominated hyper-inflammatory response and macrophage damage.

Numerous studies reveal a role of the type I interferon (IFN-I) pathway in the immunopathology caused by intracellular bacteria, including *Mtb*[56-59], chronic viral infections[60-62] and autoimmunity (reviewed in[63-65]). Our studies reveal a mechanism of stress-mediated IFN-I pathway upregulation that makes macrophages less resilient to

subsequent infection with intracellular bacteria and is associated with immunopathology in vivo. Obviously, this susceptibility-associated mechanism represents an attractive therapeutic target. On a cautionary note, however, elements of this pathway may represent imperfect, but necessary, backup strategy of stress adaptation, and their inhibition may be detrimental[39]. Thus, we observed that inhibition of HSF1 and JNK increases expression of stress markers, while blocking the IFN-I signaling increases replication of intracellular bacteria in TNF-primed susceptible macrophages. In contrast, inhibiting transcriptional activity of c-Myc, which is upstream of stress initiation in the *sst1S* phenotype, improved both macrophage survival and the bacterial control in vitro. We hypothesize that in vivo, Myc downregulation is a part of macrophage reprogramming within inflammatory milieu that allows balancing metabolism and pre-adaption to pathogen encounter.

Despite its focus on effects of a single genetic locus, our study reveals a generalizable paradigm in host - pathogen interactions. Traditionally, susceptibility to a specific pathogen is viewed as immune defect associated with inability to mount appropriate effector responses. Therefore, studies have been primarily focused on molecules involved in pathogen recognition and immune effector functions. A wealth of information about those molecules and associated essential mechanisms of host immunity has been obtained studying extreme susceptibility to infections in humans and knockout mice (reviewed in [66-68]). Our study demonstrates emergent properties of the susceptible phenotype that develop gradually and locally within inflammatory tissue due to an imbalance of growth, differentiation and stress responses. This explains how successful pathogens may exploit this regulatory failure to subvert and bypass mechanisms of resistance locally in otherwise immune competent hosts in order to ensure survival of both the host and the pathogen and successful transmission of the later[69]. Since the *sst1*-susceptible phenotype in mice closely resembles pathology of human TB, we speculate that environmental exposures, metabolic stressors and co-infections linked to TB risk or severity may also activate this nascent mechanism of infection susceptibility and immunopathology in humans. Thus, this

study provides a novel conceptual framework and a mouse model for the development of host-directed therapies effectively targeting immunopathology in immune competent susceptible individuals. This pathogenesis-based strategy needs further validation in vivo using sst1-mediated and other models of susceptibility to intracellular pathogens.

## **MATERIALS & METHODS**

### **Reagents**

Recombinant mouse TNF was from Peprotech and recombinant mouse IL-3 was from R&D. Mouse monoclonal antibody to mouse TNF (MAb; clone XT22) was from Thermo scientific and isotype control and mouse monoclonal antibody to mouse IFN $\beta$  (Clone: MAR1-5A3) was from eBiosciences. BAY 11-7082, Phenylbutyrate sodium (PBA), rapamycin were from Enzo Life sciences. SB203580, SP600125 and C16 were obtained from were from calbiochem. JQ1, Flavopiridol, 10058-F4 were from Tocris. ISRIB, poly I:C, LPS from *E. coli*(055:B5), Triptolide and BHA were obtained from Sigma. BX-795 was from Invivogen. RHT was kindly provided from Aaron Beeler, CMD department, BU.

### **Animals**

C57BL/6J and C3HeB/FeJ inbred mice were obtained from the Jackson Laboratory (Bar Harbor, Maine, USA). The C3H.B6-sst1, C3H.scid and C3H.B6-sst1, scid mouse strains were generated in our laboratory as described previously[5, 8, 70]. The B6.C3H-sst1 mice were obtained by transferring the sst1 susceptible allele on the B6 (C57BL/6J) genetic background using ten backcrosses. All experiments were performed with the full knowledge and approval of the Standing Committee on Animals at Boston University in accordance with relevant guidelines and regulations (IACUC protocol number AN15276).

### **BMDMs culture**

Isolation of mouse bone marrow and culture of BMDMs were carried out as previously described[71]. TNF-activated macrophages were obtained by culture of cells for various times with recombinant mouse TNF (10 ng/ml).



## **Macrophage infection with *F. tularensis* LVS**

*F. tularensis* live vaccine strain (LVS) were grown in Brain-Heart Infusion broth overnight, harvested and then diluted in media without antibiotics to get the desired MOI. BMDM were seeded in tissue culture plates. Cells were treated with TNF and inhibitors were added after 4hrs of TNF addition. After 24hrs of treatment, cells were infected at indicated MOI. The plates were then centrifuged at 500× g for 15 minutes and incubated for 1hr at 37°C with 5% CO<sub>2</sub>. Cells were then washed with fresh media, and incubated for 45 min at 37°C with media containing gentamicin (50 μg/mL) to kill any extracellular bacteria. Cells were washed again and cultured in presence of inhibitors and TNF in DMEM/F12 containing 10% FBS medium without antibiotic at 37°C in 5% CO<sub>2</sub> for 24hrs.

## **Bacterial DNA isolation and quantification**

For isolation of LVS DNA from 96-well plates, cells were lysed with 50 ul of 250mM NaOH, 0.2 mM EDTA and kept at RT for 10 mins. The samples were then heated for 45 mins at 95°C and neutralized with 50 ul 40mM Tris-HCL, pH 8.0. DNA was then isolated by purification with magnetic beads. TaqMan PCR conditions were carried out according to previous studies(ref). All PCR reactions were performed in a final volume of 20ul and contained Taqman Environmental mastermix (Applied Biosystems) at a 1X final concentration, probe (250nM), and primers (450nM). The primers used were FopAF: ATCTAGCAGGTCAAGCAACAGGT, FopAR: GTCAACACTTGCTTGAAC-ATTTCTAGATA, and the probe FOPAP: CAAACTTAAGACCACCACCCACATCCCAA. Thermal cycling conditions were 50°C for 2 min, 95°C for 10 min, 45 cycles at 95°C for 10 s and 60°C for 30 s, and then 45°C for 5 min.

## **Immunoblotting**

To monitor the Ipr1 protein levels we have developed Ipr1 peptide-specific rabbit polyclonal antibodies, which recognized the Ipr1 protein of predicted length on Western blots (ref Sc Report paper). BMDM's were subjected to treatments specified in the text. Nuclear extracts were prepared using the nuclear extraction kit from signosis. Whole cell extracts were prepared by lysing the cells in RIPA buffer supplemented with protease inhibitor cocktail and phosphatase inhibitor I and III (Sigma). Equal amounts (30 µg) of protein from whole-cell extracts was separated by SDS-PAGE and transferred to PVDF membrane (Millipore). After blocking with 5% skim milk in TBS-T buffer [20 mM Tris-HCl (pH 7.5), 150 mM NaCl, and 0.1% Tween20] for 2 hour, the membranes were incubated with the primary antibody overnight at 4 °C. Bands were detected with enhanced chemiluminescence (ECL) kit (Perkin Elmer). Stripping was performed using WB stripping solution (Thermo scientific). The loading control β-actin (Sigma, 1:2000) was evaluated on the same membrane. The Ipr1-specific rabbit anti-serum was generated by Covance Research Products, Inc. (Denver, CO, USA)(1:500) as described previously[71]. The Ipr1 monoclonal antibodies were generated using Ipr1 peptides from Abmart. ATF4, ATF3, Gadd34, c-Myc, Daxx, p21, PKR and phospho-PKR antibodies were obtained from Santacruz biotechnology. IRF1, IRF3 (1:1000), p38, p-p38, JNK, p-JNK antibodies were obtained from Cell signaling. Hspa1a (1:1000) antibody was obtained from R&D. β-actin (1:2000) was obtained from Sigma. Bim and DHCR7 were obtained from Abcam.

## **RNA Isolation and quantitative PCR**

Total RNA was isolated using the RNeasy Plus mini kit (Qiagen). cDNA synthesis was performed using the SuperScript II (Invitrogen). Real-time PCR was performed with the GoTaq qPCR Mastermix (Promega) using the CFX-90 real-time PCR System (Bio-Rad). Oligonucleotide primers were designed using Primer 3 software (**Supplementary Table S1**) and specificity was

confirmed by melting curve analysis. Thermal cycling parameters involved 40 cycles under the following conditions: 95 °C for 2 mins, 95 °C for 15 s and 60 °C for 30 s. Each sample was set up in triplicate and normalized to RPS17 or 18S expression by the DDCT method.

### **Immunofluorescence microscopy**

Cells were fixed with 4% paraformaldehyde for 15 min at RT, cells were permeabilised with 0.25% Triton-X for 30 min and then blocked for 20 min with goat-serum (2.5%). Cells were incubated with primary antibodies [mouse monoclonal antibodies against J2 (1:3000), overnight at 4 °C in 2.5% goat serum, and incubated with Alexa Fluor 488- conjugated donkey anti-mouse IgG (excitation/emission maxima ~ 490/525 nm) (1:1000, Invitrogen) secondary antibody for 2 hrs. Images were acquired using Leica SP5 confocal microscope. All images were processed using Image J software.

### **Hoechst/PI Staining Method for cell cytotoxicity**

For cell viability assays BMDM were plated in 96 well tissue culture plates (12000 cells/well) in phenol-red free DMEM/F12 media and subjected to necessary treatments. Hoechst (Invitrogen, 10  $\mu$  M) and PI (Calbiochem, 2  $\mu$  M) were added. The plates were kept at 37 °C for 15 min and read in the celigo cell cytometer. The % of total and dead cells was calculated for each treatment.

### **Transcription factor profiling analysis**

Each array assay was performed following the procedure described in the TF activation profiling plate array kit user manual (Signosis, Inc, FA-001). 10  $\mu$ g of nuclear extract was first incubated with the biotin labeled probe mix at room temperature for 30 min. The activated TFs were bound to the corresponding DNA binding probes. After the protein/DNA complexes were isolated from unbound probes, the bound probes were eluted and hybridized with the plate pre-coated with

the capture oligos. The captured biotin-labeled probes were then detected with Streptavidin–HRP and subsequently measured with the Tecan microplate reader.

### **Gel shift assay**

The nuclear extracts with 12 h of TNF treatment in sst1R and sst1S were chosen for gel shift assay analysis with EMSA kits (Signosis Inc). The TF DNA binding probe sequences are listed below.

1. AP1: CGCTTGATGACTCAGCCGGAA
2. c-Myc: AGTTGACCACGTGGTCTGGG

The sequences that we used as probes for gel shift assay are identical to those we used as the probe mix for TF activation profiling array assay. 5ug nuclear extracts were incubated with 1× binding buffer and biotin-labeled probe for 30 min at room temperature to form protein/DNA complexes. The samples were then electrophoresed on a 6 % polyacrylamide gel in 0.5 % TBE at 120 V for 45 min and then transferred onto a nylon membrane in 0.5 % TBE at 300 mA for 1 h. After transfer and UV cross-linking, the membrane was detected with Streptavidin–HRP. The image was acquired using a FluorChem imager (Alpha Innotech Corp).

### **siRNA knockdown**

Gene knockdown was done using GenMute (SignaGen) and Flexitube Genesolution siRNAs from Qiagen. All star negative control siRNA (SI03650318) from Qiagen was used as a negative control. sst1S and sst1R BMDMs were seeded into 6-well plates at a density of  $2.5 \times 10^5$  per well and grown as mentioned before. Shortly before transfection, the culture medium was removed and replaced with 1 ml complete medium, and the cells were returned to normal growth conditions. To create transfection complexes, 15 nM siRNA (pool of 4 siRNAs) in 1×

GenMuteBuffer (total 500 ml) was incubated with 1.5  $\mu$ l of Genemute transfection reagent for 15-20 minutes at room temperature. The complexes were added drop-wise onto the cells. Cells were incubated with the transfection complexes for 24 hours at 37<sup>0</sup> in 5% CO<sub>2</sub>. After 24hrs cells were washed to remove siRNA and replaced with fresh media. TNF (10ng/ml) was added for 24hrs and BMDMs were harvested as outlined below. siRNA pools included: Irf1 (GS16362), Irf3 (GS54131), Irf7(GS54123)

## **ELISA**

Supernatants were collected from mouse macrophages after 24hrs of stimulation with TNFa or poly IC. IFNb was measured using the mouse IFN-b ELISA kit from pbl Assay Science. ELISAs were done as recommended by the manufacturer.

## **Acknowledgement**

This work was sponsored by R01 HL133190 and R01 HL126066 to IK. The authors are grateful to Drs. Robert Silverman and Benjamin Wolozin for helpful discussions.

The authors declare no competing interests.

## Figure Legends

### **Figure 1. Super-induction of IFN $\beta$ in B6-sst1S BMDM after prolonged stimulation with TNF.**

**A)** IFN $\beta$  protein concentration in supernatants of B6wt and B6-sst1S BMDM treated with 10ng/ml TNF $\alpha$  for 24 h was detected using ELISA. Results represent data from two independent experiments. **B)** Timecourse of IFN $\beta$  mRNA expression in B6-sst1S and B6wt BMDMs after treatment with 10ng/mL, as determined using real time qRT-PCR. The data are representative of three biological replicas. **C)** Effects of TNF stimulation and siRNA knockdown on IRF1 protein expression in B6 and B6-sst1S BMDMs stimulated with 10 ng/ml of TNF for 24 h. Cells were treated with siRNA 24 h prior to stimulation with TNF. Immunoblot using IRF1-specific polyclonal antibodies represents data from two independent experiments. **D)** IFN $\beta$  mRNA expression in TNF-stimulated B6 and B6-sst1S BMDM after knockdown of *Irf1*, *Irf3* and *Irf7* using siRNA (scrambled control siRNA). The data are representative of two independent biological replicas. **E)** Effect of TNF and IFN-I receptor blockade on IFN $\beta$  mRNA expression in B6-sst1S BMDM treated with 10ng/ml TNF $\alpha$  for 16 h.  $\alpha$ -IFNAR1,  $\alpha$ -TNF $\alpha$  and isotype control antibodies (10 ug/ml) were added at 2, 4, 8 and 12 h of TNF treatment. IFN $\beta$  mRNA expression was calculated as % inhibition with respect to cells treated with 10ng/mL TNF $\alpha$  and isotype control antibodies. The data are representative of three independent experiments. **F)** Effect of small molecule inhibitors on IFN $\beta$  mRNA expression in B6-sst1S BMDM treated with 10ng/ml TNF $\alpha$  for 16 h. Inhibitors of TBK1, JNK, NF- $\kappa$ B and PKR were added after 12 h of TNF stimulation for four hours. IFN $\beta$  mRNA expression was measured by real time qRT-PCR and normalized to expression of 18S mRNA. The relative gene expression is calculated relative to the mRNA expression in untreated cells (set as 1). The data are representative of two independent experiments.

**Figure 2. Transcriptional control of IFN $\beta$  super-induction in B6-sst1S macrophages by TNF.**

**A)** Transcription factor (TF) binding activities were compared using Transcription Factor Profiling Array (Signosis). Nuclear extracts (NE) were isolated from B6 and B6-sst1S BMDMs stimulated with TNF (10 ng/ml) for 12 h. Results represent data from two independent experiments. **B)** Validation of TF arrays results using EMSA with c-Myc and AP1 probes. NE were isolated at 12 h of TNF stimulation, as above. Left panel - AP-1: 1- B6wt NE, 2 – B6-sst1S NE, 3- cold probe. The arrow denotes AP1 free probe. Right panel - c-Myc: 1-free probe, 2 – B6wt NE, 3 – B6-sst1S NE, 4- cold probe. Results represent data from two independent experiments. **C)** c-Myc protein levels in nuclear extracts of B6 and B6-sst1S BMDM stimulated with TNF (10ng/mL) for the indicated times (representative of two experiments). **D).** Effect c-Myc knockdown on IFN $\beta$  mRNA expression in B6-sst1S BMDM stimulated with TNF (10 ng/ml) for 18 h. **E)** Effect of inhibitors on IFN $\beta$  and Rsad2 mRNA expression in TNF stimulated B6-sst1S BMDM. Inhibitors of c-Myc (10058-F4), PTEFb (Flavopiridol) and Brd4 (JQ1) were added after 2h and 8h of TNF stimulation. IFN $\beta$  and Rsad2 mRNA expression was measured at 18 h of stimulation with TNF (10ng/mL). **F)** Timecourse of p21 protein expression in B6 and B6-sst1S BMDM treated with 10ng/mL of TNF $\alpha$ . The immunoblot data represent results of two independent experiments. **H)** No effects of TNF, c-Myc or JNK inhibitors added 12h of TNF stimulation on Hspa1a mRNA expression at 16 h. **G)** Time course of Hspa1a protein expression in B6 and B6-sst1S BMDMs stimulated with 10ng/mL TNF $\alpha$  for indicated times (representative of three experiments).

**Figure 3. Comparison of global gene expression profiles of B6-sst1 vs B6wt BMDMs stimulated with TNF for 18 h.**

**A)** Comparison of gene expression profiles of B6-sst1S vs B6 BMDM stimulated with TNF (10ng/mL) for 18 h using hierarchical clustering and gene set expression analysis (GSEA). The global gene expression was determined using Affimetrix GeneChip Mouse Gene 2.0 Arrays. **B)** Validation of microarray data using gene-specific real time qRT-PCR. **C)** Effect of ROS inhibitor BHA on IFN $\beta$  and ISR gene expression in B6-sst1S BMDM treated with 10ng/mL of TNF for 24 h. The gene expression is normalized to expression of 18S mRNA or RPS17 mRNA and presented relative to expression in untreated cells (set as 1). **D)** Effect of ISRIB on mRNA expression of IFN $\beta$  and ISR target genes Trb3 and Chac1 in B6-sst1S BMDM were treated with 10ng/mL of TNF for 24 h. Gene expression was measured by real time qRT-PCR and calculated as % inhibition with respect to cells treated with 10ng/mL TNF. The qRT-PCR results represent data from three independent experiments.

**Figure 4. TNF treatment leads to bi-phasic upregulation of integrated stress response in B6-sst1S BMDM. A)** Timecourses of the ISR gene mRNA expression: Atf3, Chop10, Chac1, Trb3 and Ddit4 mRNA expression levels in B6-sst1S and B6wt BMDMs after treatment with TNF (10ng/mL). **B)** Timecourse of ISR protein expression in TNF-stimulated macrophages. Immunoblot analysis of ATF3, ATF4 and GADD34 levels in whole cell extracts of B6wt and B6-sst1S BMDM treated with 10ng/mL of TNF $\alpha$  for the indicated times. **C)** Real time qRT-PCR analysis of the mRNA kinetics of IFN $\beta$  and ISR genes in B6-sst1S BMDMs after stimulation with 10ng/mL TNF for 8, 10, 12 and 14 h. Real time PCR data is normalized to expression of 18S mRNA and presented relative to expression in untreated cells (set as 1). **D)** Time dependent effects of TNF and IFNAR blockade and ROS inhibition on Trb3 and Chac1 mRNA expression in B6-sst1S BMDM treated with 10ng/ml TNF $\alpha$  for 16hrs.  $\alpha$ -IFNAR1,  $\alpha$ -TNF $\alpha$ , BHA and isotype control antibodies were added after 2, 4, 8 and 12 h of TNF treatment. Trb3 and Chac1 mRNA expression was calculated as % inhibition with respect to cells treated with



10ng/mL TNF $\alpha$ . **E)** Effect of inhibitors on late phase ISR gene expression in TNF stimulated B6-sst1S BMDM. Inhibitors of JNK, ER stress (PBA), PKR, ISR and TBK1 were added after 12h of TNF stimulation(10 ng/mL), and Trb3 and Chac1 mRNA levels were measured at 16h. Trb3 and Chac1 mRNA expression was normalized to expression of 18S rRNA and presented relative to expression in untreated cells (set as 1). The qPCR results represent data from three independent experiments. **F)** Timecourse of PKR protein expression in B6-sst1S and B6wt BMDMs treated with TNF (10ng/mL) for indicated times. The Western blot is representative of two independent experiments.

**Figure 5. Proteins differentially expressed in TNF-stimulated B6-sst1S and B6wt**

**macrophages.** Validation of proteomics data using immunoblot analysis and the kinetics of Trib3(**A**), Bim(**B**), Daxx(**C**), Ipr1(**D**) and DHCR7(**E**) proteins in B6-sst1S and B6wt BMDMs treated with 10ng/mL of TNF. Whole cell extracts were isolated at indicated times. **F)** Effect of JNK and p38 inhibitors and IFNAR blockade on IPR1 protein induction in B6wt BMDM treated with 10ng/mL of TNF $\alpha$  for 24 h. The inhibitors were added at the beginning (0hr) or after 3hrs of TNF stimulation. Immunoblotting was carried out using Ipr1 polyclonal antibody and represents two independent experiments.

**Figure 6. Effect of TNF priming on infection with *F.t.* LVS in sst1S BMDM. A)** Survival of B6-sst1S BMDM, either naïve (control) or primed with 10ng/mL of TNF $\alpha$  for 16 h, after infection with *F.t.* LVS at MOI 1, 3 and 10 for 24 h. Percentage of PI-positive cells was determined using automated microscopy (Celigo). **B)** Effect of the sst1 locus on survival of B6-sst1S and B6wt BMDM treated with TNF and infected with *F.t.* LVS at MOI =1. Cell death was measured using % of PI positive cells, as above. **C)** Effect of TNF priming on *F.t.* LVS control by the B6-sst1S BMDM. The macrophages, either naïve or primed with 10ng/mL of TNF $\alpha$  for 16hrs, were

infected with *F.t.* LVS at MOI 1 and 3 for 24 h. The bacterial loads were determined using qPCR. **D)** Comparison of the effects of TNF and *F.t.*LVS infection on IFN-I and stress response gene expression in B6-sst1S BMDM. Macrophages, either naïve or primed with 10ng/mL of TNF $\alpha$  for 16 h, were infected with *F.t.* LVS at MOI 0.5 and 1.5 for 24hrs. IFN $\beta$ , Rsad2, Hspa1a, Trb3 and Chac1 mRNA expression was measured using qRT-PCR. Real time PCR data is normalized to expression of 18S RNA and presented relative to expression in untreated cells (set as 1). **E)** Effect of small molecule inhibitors on cell death of B6-sst1S BMDM primed with 10ng/mL of TNF $\alpha$  for 16 h and infected with *F.t.* LVS at MOI=1 for 24hrs. The inhibitors were added after 4hrs of TNF treatment. Cell death was measured as % of PI positive cells using automated microscopy. **F)** Total (live and dead) numbers of cells treated as in E) was estimated by measuring total number of viable and dead (PI+) cells. **G-H)** Effects of the pathway inhibitors and their pairwise combinations on bacterial loads (**G**) and macrophage cell death (**H**) in TNF-stimulated B6-sst1S BMDM infected with *F.t.*LVS (MOI=1). Cells were primed with TNF, infected with *F.t.* LVS and treated with inhibitors as described above. All cell death data is representative of three independent experiments. Bacterial enumeration was done using real time qPCR and was normalized to total cell number determined using automated microscopy. All qPCR results represent data from three independent experiments.

**Figure 7. The *sst1* locus controls host resistance to aerosol infection with *F.t.* LVS.**

**A)** Survival of the *sst1*<sup>R</sup> and *sst1*<sup>S</sup> inbred mouse strains after aerosol infection with 1600 CFU of *F.t.* LVS. Six mice per group were used in each strain. **B)** Kinetics of *F.t.* LVS growth in the lungs of the *sst1*<sup>R</sup> and *sst1*<sup>S</sup> mice after the aerosol infection with 1,600 CFU of *F.t.* LVS. Four mice per group were sacrificed at each time point for CFU determination using plating of serial dilutions of lung homogenates. **C)** Histopathology of the lungs of *sst1*<sup>S</sup> (upper panels) and *sst1*<sup>R</sup> (lower panels) 11 days post aerosol infection with 1,600 CFU of *F.t.* LVS. H&E staining, magnification X40

(left panels) and X200 (right panels). **D**) Intracellular cytokine staining of the lung cells isolated 5 (white bars) or 10 (grey bars) days post aerosol infection with 300 CFU of *F.t.* LVS. Three mice per group were used in the experiment. S - sst1<sup>S</sup>; R - sst1<sup>R</sup>. Data is representative of two independent experiments.

**Table 1** Flow cytometry of lymphoid lung cells 8 days following aerosol challenge of C3H and C3H.B6-sst1 mice with 300 CFU of *F.t.* LVS

| Mouse strain                      | C3H        |      | C3H.B6-sst1 |      |
|-----------------------------------|------------|------|-------------|------|
|                                   | % of total | SD   | % of total  | SD   |
| CD4 <sup>+</sup>                  | 8.2        | 4.6  | 7.5         | 1.3  |
| % of CD69 <sup>+</sup>            | 25.7       | 9.2  | 28.1        | 6.9  |
| CD8 <sup>+</sup>                  | 4.0        | 1.3  | 5.6         | 2.5  |
| % of CD69 <sup>+</sup>            | 36.2       | 7.2  | 33.7        | 5.5  |
| DX5 <sup>+</sup> CD4 <sup>-</sup> | 10.1       | 4.6  | 11.2        | 3.0  |
| % of CD69 <sup>+</sup>            | 7.7        | 1.6  | 7.4         | 0.6  |
| DX5 <sup>+</sup> CD4 <sup>+</sup> | 0.23       | 0.17 | 0.15        | 0.04 |
| % of CD69 <sup>+</sup>            | 26.2       | 2.5  | 30.2        | 6.5  |
| CD19 <sup>+</sup>                 | 1.12       | 0.60 | 2.21        | 0.67 |
| % of I-A <sup>K+</sup>            | 100        | 0    | 100         | 0    |

**Table 2** Flow cytometry of myeloid lung cells 8 days following aerosol challenge of C3H and C3H.B6-sst1 mice with 300 CFU of *F.t.LVS*

| Mouse strain                                           | C3H        |     | C3H.B6-sst1 |     |
|--------------------------------------------------------|------------|-----|-------------|-----|
| Myeloid cell population                                | % of total | SD  | % of total  | SD  |
| F4/80 <sup>-</sup> Ly6C <sup>+</sup>                   | 11.2       | 2.0 | 5.3         | 3.7 |
| F4/80 <sup>+</sup> Ly6C <sup>+</sup>                   | 12.7       | 4.4 | 19.5        | 7.2 |
| F4/80 <sup>+</sup> Ly6C <sup>-</sup>                   | 0          | 0   | 0           | 0   |
| Ly6G <sup>+</sup> F4/80 <sup>-</sup> Ly6C <sup>-</sup> | 39.3       | 9.5 | 37.7        | 5.2 |

## References

1. Kramnik I, Demant P, Bloom BB. Susceptibility to tuberculosis as a complex genetic trait: analysis using recombinant congenic strains of mice. *Novartis Found Symp.* 1998;217:120-31; discussion 32-7. PubMed PMID: 9949805.
2. Kramnik I, Dietrich WF, Demant P, Bloom BR. Genetic control of resistance to experimental infection with virulent *Mycobacterium tuberculosis*. *Proc Natl Acad Sci U S A.* 2000;97(15):8560-5. doi: 10.1073/pnas.150227197. PubMed PMID: 10890913; PubMed Central PMCID: PMC26987.
3. Sissons J, Yan BS, Pichugin AV, Kirby A, Daly MJ, Kramnik I. Multigenic control of tuberculosis resistance: analysis of a QTL on mouse chromosome 7 and its synergism with *sst1*. *Genes Immun.* 2009;10(1):37-46. doi: 10.1038/gene.2008.68. PubMed PMID: 18784733; PubMed Central PMCID: PMC3060060.
4. Yan BS, Kirby A, Shebzukhov YV, Daly MJ, Kramnik I. Genetic architecture of tuberculosis resistance in a mouse model of infection. *Genes Immun.* 2006;7(3):201-10. doi: 10.1038/sj.gene.6364288. PubMed PMID: 16452998.
5. Pichugin AV, Yan BS, Sloutsky A, Kobzik L, Kramnik I. Dominant role of the *sst1* locus in pathogenesis of necrotizing lung granulomas during chronic tuberculosis infection and reactivation in genetically resistant hosts. *Am J Pathol.* 2009;174(6):2190-201. doi: 10.2353/ajpath.2009.081075. PubMed PMID: 19443700; PubMed Central PMCID: PMC2684184.
6. Boyartchuk V, Rojas M, Yan BS, Jobe O, Hurt N, Dorfman DM, et al. The host resistance locus *sst1* controls innate immunity to *Listeria monocytogenes* infection in immunodeficient mice. *J Immunol.* 2004;173(8):5112-20. PubMed PMID: 15470055.
7. He X, Berland R, Mekasha S, Christensen TG, Alroy J, Kramnik I, et al. The *sst1* resistance locus regulates evasion of type I interferon signaling by *Chlamydia pneumoniae* as a

disease tolerance mechanism. *PLoS Pathog.* 2013;9(8):e1003569. doi:

10.1371/journal.ppat.1003569. PubMed PMID: 24009502; PubMed Central PMCID:

PMCPMC3757055.

8. Pan H, Yan BS, Rojas M, Shebzukhov YV, Zhou H, Kobzik L, et al. *Ipr1* gene mediates innate immunity to tuberculosis. *Nature.* 2005;434(7034):767-72. doi: 10.1038/nature03419.

PubMed PMID: 15815631; PubMed Central PMCID: PMCPMC1388092.

9. Cliffe ST, Bloch DB, Suryani S, Kamsteeg EJ, Avery DT, Palendira U, et al. Clinical, molecular, and cellular immunologic findings in patients with SP110-associated veno-occlusive disease with immunodeficiency syndrome. *J Allergy Clin Immunol.* 2012;130(3):735-42 e6. doi:

10.1016/j.jaci.2012.02.054. PubMed PMID: 22621957.

10. Leu JS, Chen ML, Chang SY, Yu SL, Lin CW, Wang H, et al. SP110b Controls Host Immunity and Susceptibility to Tuberculosis. *Am J Respir Crit Care Med.* 2017;195(3):369-82.

doi: 10.1164/rccm.201601-0103OC. PubMed PMID: 27858493; PubMed Central PMCID:

PMCPMC5328177.

11. Flynn JL, Goldstein MM, Chan J, Triebold KJ, Pfeffer K, Lowenstein CJ, et al. Tumor necrosis factor- $\alpha$  is required in the protective immune response against *Mycobacterium tuberculosis* in mice. *Immunity.* 1995;2(6):561-72. PubMed PMID: 7540941.

12. Yarilina A, Park-Min KH, Antoniv T, Hu X, Ivashkiv LB. TNF activates an IRF1-dependent autocrine loop leading to sustained expression of chemokines and STAT1-dependent type I interferon-response genes. *Nat Immunol.* 2008;9(4):378-87. doi:

10.1038/ni1576. PubMed PMID: 18345002.

13. Santagata S, Mendillo ML, Tang Yc, Subramanian A, Perley CC, Roche SP, et al. Tight Coordination of Protein Translation and HSF1 Activation Supports the Anabolic Malignant State.

*Science.* 2013;341(6143):1238303-. doi: 10.1126/science.1238303.

14. Rahl PB, Lin CY, Seila AC, Flynn RA, McCuine S, Burge CB, et al. c-Myc Regulates Transcriptional Pause Release. *Cell.* 2010;141(3):432-45. doi: 10.1016/j.cell.2010.03.030.

15. Lin CY, Lovén J, Rahl PB, Paranal RM, Burge CB, Bradner JE, et al. Transcriptional Amplification in Tumor Cells with Elevated c-Myc. *Cell*. 2012;151(1):56-67. doi: 10.1016/j.cell.2012.08.026.
16. Delmore JE, Issa GC, Lemieux ME, Rahl PB, Shi J, Jacobs HM, et al. BET bromodomain inhibition as a therapeutic strategy to target c-Myc. *Cell*. 2011;146(6):904-17. doi: 10.1016/j.cell.2011.08.017. PubMed PMID: 21889194; PubMed Central PMCID: PMC3187920.
17. Yamasaki M, Kang H-R, Homer RJ, Chapoval SP, Cho SJ, Lee BJ, et al. P21 regulates TGF-beta1-induced pulmonary responses via a TNF-alpha-signaling pathway. *American journal of respiratory cell and molecular biology*. 2008;38(3):346-53. doi: 10.1165/rcmb.2007-0276OC. PubMed PMID: 17932374.
18. Rackov G, Hernández-Jiménez E, Shokri R, Carmona-Rodríguez L, Mañes S, Álvarez-Mon M, et al. p21 mediates macrophage reprogramming through regulation of p50-p50 NF- $\kappa$ B and IFN- $\beta$ . *Journal of Clinical Investigation*. 2016;126(8):3089-103. doi: 10.1172/jci83404. PubMed PMID: 10.1172/jci83404.
19. Chen W, Sun Z, Wang X-J, Jiang T, Huang Z, Fang D, et al. Direct Interaction between Nrf2 and p21Cip1/WAF1 Upregulates the Nrf2-Mediated Antioxidant Response. *Molecular cell*. 2009;34(6):663-73. doi: 10.1016/j.molcel.2009.04.029. PubMed PMID: 10.1016/j.molcel.2009.04.029.
20. Asada M, Yamada T, Ichijo H, Delia D, Miyazono K, Fukumuro K, et al. Apoptosis inhibitory activity of cytoplasmic p21(Cip1/WAF1) in monocytic differentiation. *The EMBO journal*. 1999;18(5):1223-34. doi: 10.1093/emboj/18.5.1223. PubMed PMID: 10064589; PubMed Central PMCID: PMC1171213.
21. Lu PD, Jousse C, Marciniak SJ, Zhang Y, Novoa I, Scheuner D, et al. Cytoprotection by pre-emptive conditional phosphorylation of translation initiation factor 2. *The EMBO journal*.



2004;23(1):169-79. doi: 10.1038/sj.emboj.7600030. PubMed PMID: 14713949; PubMed Central PMCID: PMCPMC1271668.

22. Harding HP, Zhang Y, Zeng H, Novoa I, Lu PD, Calton M, et al. An integrated stress response regulates amino acid metabolism and resistance to oxidative stress. *Molecular cell*. 2003;11(3):619-33. PubMed PMID: 12667446.

23. Taniuchi S, Miyake M, Tsugawa K, Oyadomari M, Oyadomari S. Integrated stress response of vertebrates is regulated by four eIF2 $\alpha$  kinases. *Scientific Reports*. 2016;6(1):32886. doi: 10.1038/srep32886.

24. Sidrauski C, McGeachy AM, Ingolia NT, Walter P. The small molecule ISRIB reverses the effects of eIF2 $\alpha$  phosphorylation on translation and stress granule assembly. *Elife*. 2015;4. doi: 10.7554/eLife.05033. PubMed PMID: 25719440; PubMed Central PMCID: PMCPMC4341466.

25. Özcan U, Yilmaz E, Özcan L, Furuhashi M, Vaillancourt E, Smith RO, et al. Chemical Chaperones Reduce ER Stress and Restore Glucose Homeostasis in a Mouse Model of Type 2 Diabetes. *Science (New York, NY)*. 2006;313(5790):1137-40. doi: 10.1126/science.1128294. PubMed PMID: 16931765; PubMed Central PMCID: PMCPMC4741373.

26. Ingrand S, Barrier L, Lafay-Chebassier C, Fauconneau B, Page G, Hugon J. The oxindole/imidazole derivative C16 reduces in vivo brain PKR activation. *FEBS letters*. 2007;581(23):4473-8. doi: 10.1016/j.febslet.2007.08.022.

27. Hull CM, Bevilacqua PC. Discriminating Self and Non-Self by RNA: Roles for RNA Structure, Misfolding, and Modification in Regulating the Innate Immune Sensor PKR. *Accounts of Chemical Research*. 2016;49(6):1242-9. doi: 10.1021/acs.accounts.6b00151.

28. Nakamura T. dsRNA in immunometabolism. *Oncotarget*. 2015;6(24):19940-1. doi: 10.18632/oncotarget.5100. PubMed PMID: 26343371; PubMed Central PMCID: PMCPMC4652966.

29. Weber F, Wagner V, Rasmussen SB, Hartmann R, Paludan SR. Double-Stranded RNA Is Produced by Positive-Strand RNA Viruses and DNA Viruses but Not in Detectable Amounts by Negative-Strand RNA Viruses. *Journal of virology*. 2006;80(10):5059-64. doi: 10.1128/JVI.80.10.5059-5064.2006. PubMed PMID: 16641297.
30. Nakamura T, Furuhashi M, Li P, Cao H, Tuncman G, Sonenberg N, et al. Double-Stranded RNA-Dependent Protein Kinase Links Pathogen Sensing with Stress and Metabolic Homeostasis. *Cell*. 2010;140(3):338-48. doi: 10.1016/j.cell.2010.01.001.
31. Zhang Y, Larade K, Jiang Z-g, Ito S, Wang W, Zhu H, et al. The flavoheme reductase Ncb5or protects cells against endoplasmic reticulum stress-induced lipotoxicity. *Journal of lipid research*. 2010;51(1):53-62. doi: 10.1194/jlr.M900146-JLR200. PubMed PMID: 19609006; PubMed Central PMCID: PMCPMC2789786.
32. Lorenzon-Ojea AR, Caldeira W, Ribeiro AF, Fisher SJ, Guzzo CR, Bevilacqua E. Stromal cell derived factor-2 (Sdf2): A novel protein expressed in mouse. *The International Journal of Biochemistry & Cell Biology*. 2014;53:262-70. doi: 10.1016/j.biocel.2014.05.024.
33. Garg B, Pathria G, Wagner C, Maurer M, Wagner SN. Signal Sequence Receptor 2 is required for survival of human melanoma cells as part of an unfolded protein response to endoplasmic reticulum stress. *Mutagenesis*. 2016;31(5):573-82. doi: 10.1093/mutage/gew023.
34. Hori O, Miyazaki M, Tamatani T, Ozawa K, Takano K, Okabe M, et al. Deletion of SERP1/RAMP4, a component of the endoplasmic reticulum (ER) translocation sites, leads to ER stress. *Molecular and Cellular Biology*. 2006;26(11):4257-67. doi: 10.1128/MCB.02055-05. PubMed PMID: 16705175; PubMed Central PMCID: PMCPMC1489087.
35. Jeon T-I, Osborne TF. SREBPs: metabolic integrators in physiology and metabolism. *Trends in endocrinology and metabolism: TEM*. 2012;23(2):65-72. doi: 10.1016/j.tem.2011.10.004. PubMed PMID: 22154484; PubMed Central PMCID: PMCPMC3273665.

36. Park K, Scott AL. Cholesterol 25-hydroxylase production by dendritic cells and macrophages is regulated by type I interferons. *Journal of Leukocyte Biology*. 2010;88(6):1081-7. doi: 10.1189/jlb.0610318. PubMed PMID: 20699362; PubMed Central PMCID: PMCPMC2996899.
37. Hoffman B, Amanullah A, Shafarenko M, Liebermann DA. The proto-oncogene c-myc in hematopoietic development and leukemogenesis. *Oncogene*. 2002;21(21):3414-21. doi: 10.1038/sj.onc.1205400. PubMed PMID: 12032779.
38. Pello OM, De Pizzol M, Mirolo M, Soucek L, Zammataro L, Amabile A, et al. Role of c-MYC in alternative activation of human macrophages and tumor-associated macrophage biology. *Blood*. 2012;119(2):411-21. doi: 10.1182/blood-2011-02-339911. PubMed PMID: 22067385.
39. Kotas ME, Medzhitov R. Homeostasis, inflammation, and disease susceptibility. *Cell*. 2015;160(5):816-27. doi: 10.1016/j.cell.2015.02.010. PubMed PMID: 25723161; PubMed Central PMCID: PMCPMC4369762.
40. Shackelford RE, Kaufmann WK, Paules RS. Oxidative stress and cell cycle checkpoint function. *Free radical biology & medicine*. 2000;28(9):1387-404. doi: 10.1016/S0891-5849(00)00224-0.
41. Shi Y, Nikulenkov F, Zawacka-Pankau J, Li H, Gabdouliline R, Xu J, et al. ROS-dependent activation of JNK converts p53 into an efficient inhibitor of oncogenes leading to robust apoptosis. *Cell Death and Differentiation*. 2014;21(4):612-23. doi: 10.1038/cdd.2013.186.
42. Martinon F, Glimcher LH. Regulation of innate immunity by signaling pathways emerging from the endoplasmic reticulum. *Current Opinion in Immunology*. 2011;23(1):35-40. doi: 10.1016/j.coi.2010.10.016.
43. Valderrama C, Clark A, Urano F, Unanue ER, Carrero JA. *Listeria monocytogenes* induces an interferon-enhanced activation of the integrated stress response that is detrimental for resolution of infection in mice. *Eur J Immunol*. 2017;47(5):830-40. doi:

10.1002/eji.201646856. PubMed PMID: 28267207; PubMed Central PMCID:  
PMCPMC5450196.

44. Panne D, Maniatis T, Harrison SC. An atomic model of the interferon-beta enhanceosome. *Cell*. 2007;129(6):1111-23. doi: 10.1016/j.cell.2007.05.019. PubMed PMID: 17574024; PubMed Central PMCID: PMCPMC2020837.

45. Ford E, Thanos D. The transcriptional code of human IFN-beta gene expression. *Biochimica et biophysica acta*. 2010;1799(3-4):328-36. doi: 10.1016/j.bbagr.2010.01.010. PubMed PMID: 20116463.

46. Wang MC, Bohmann D, Jasper H. JNK Extends Life Span and Limits Growth by Antagonizing Cellular and Organism-Wide Responses to Insulin Signaling. *Cell*. 2005;121(1):115-25. doi: 10.1016/j.cell.2005.02.030.

47. Wu H, Wang MC, Bohmann D. JNK protects *Drosophila* from oxidative stress by transcriptionally activating autophagy. *Mechanisms of Development*. 2009;126(8-9):624-37. doi: 10.1016/j.mod.2009.06.1082.

48. Gough DJ, Messina NL, Clarke CJP, Johnstone RW, Levy DE. Constitutive Type I Interferon Modulates Homeostatic Balance through Tonic Signaling. *Immunity*. 2012;36(2):166-74. doi: 10.1016/j.immuni.2012.01.011.

49. Robertson KA, Ghazal P. Interferon Control of the Sterol Metabolic Network: Bidirectional Molecular Circuitry-Mediating Host Protection. *Frontiers in immunology*. 2016;7(10):1179. doi: 10.3389/fimmu.2016.00634.

50. Seo J-Y, Cresswell P. Viperin Regulates Cellular Lipid Metabolism during Human Cytomegalovirus Infection. *PLoS pathogens*. 2013;9(8):e1003497. doi: 10.1371/journal.ppat.1003497.

51. Shibata N, Carlin AF, Spann NJ, Saijo K, Morello CS, McDonald JG, et al. 25-Hydroxycholesterol activates the integrated stress response to reprogram transcription and translation in macrophages. *J Biol Chem*. 2013;288(50):35812-23. doi:

10.1074/jbc.M113.519637. PubMed PMID: 24189069; PubMed Central PMCID: PMCPMC3861632.

52. Gold ES, Diercks AH, Podolsky I, Podyminogin RL, Askovich PS, Treuting PM, et al. 25-Hydroxycholesterol acts as an amplifier of inflammatory signaling. *Proceedings of the National Academy of Sciences*. 2014;111(29):10666-71. doi: 10.1073/pnas.1404271111.

53. York AG, Williams KJ, Argus JP, Zhou QD, Brar G, Vergnes L, et al. Limiting Cholesterol Biosynthetic Flux Spontaneously Engages Type I IFN Signaling. *Cell*. 2015;163(7):1716-29. doi: 10.1016/j.cell.2015.11.045.

54. Bunyard P, Handley M, Pollara G, Rutault K, Wood I, Chaudry M, et al. Ribotoxic stress activates p38 and JNK kinases and modulates the antigen-presenting activity of dendritic cells. *Molecular immunology*. 2003;39(13):815-27. doi: 10.1016/S0161-5890(02)00262-6.

55. Iordanov MS, Pribnow D, Magun JL, Dinh TH, Pearson JA, Chen SL, et al. Ribotoxic stress response: activation of the stress-activated protein kinase JNK1 by inhibitors of the peptidyl transferase reaction and by sequence-specific RNA damage to the alpha-sarcin/ricin loop in the 28S rRNA. *Molecular and Cellular Biology*. 1997;17(6):3373-81. doi: 10.1128/MCB.17.6.3373. PubMed PMID: 9154836; PubMed Central PMCID: PMCPMC232190.

56. Desvignes L, Wolf AJ, Ernst JD. Dynamic Roles of Type I and Type II IFNs in Early Infection with *Mycobacterium tuberculosis*. *Journal of immunology (Baltimore, Md : 1950)*. 2012;188(12):6205-15. doi: 10.4049/jimmunol.1200255.

57. Stanley SA, Johndrow JE, Manzanillo P, Cox JS. The Type I IFN response to infection with *Mycobacterium tuberculosis* requires ESX-1-mediated secretion and contributes to pathogenesis. *J Immunol*. 2007;178(5):3143-52. Epub 2007/02/22. PubMed PMID: 17312162.

58. Dorhoi A, Yeremeev V, Nouailles G, Weiner J, Jörg S, Heinemann E, et al. Type I IFN signaling triggers immunopathology in tuberculosis-susceptible mice by modulating lung phagocyte dynamics. *European journal of immunology*. 2014;44(8):2380-93. doi: 10.1002/eji.201344219.

59. Yan B, Mayer-Barber KD. Clash of the Cytokine Titans: counter-regulation of interleukin-1 and type I interferon-mediated inflammatory responses. *Cellular and Molecular Immunology*. 2016;14(1):22-35. doi: 10.1038/cmi.2016.25.
60. Puthia M, Ambite I, Cafaro C, Butler D, Huang Y, Lutay N, et al. IRF7 inhibition prevents destructive innate immunity—A target for nonantibiotic therapy of bacterial infections. *Science Translational Medicine*. 2016;8(336):336ra59-ra59. doi: 10.1126/scitranslmed.aaf1156. PubMed PMID: 27122612.
61. Teijaro JR, Ng C, Lee AM, Sullivan BM, Sheehan KCF, Welch M, et al. Persistent LCMV Infection Is Controlled by Blockade of Type I Interferon Signaling. *Science*. 2013;340(6129):207-11. doi: 10.1126/science.1235214.
62. Wilson EB, Yamada DH, Elsaesser H, Herskovitz J, Deng J, Cheng G, et al. Blockade of Chronic Type I Interferon Signaling to Control Persistent LCMV Infection. *Science*. 2013;340(6129):202-7. doi: 10.1126/science.1235208.
63. Ivashkiv LB, Donlin LT. Regulation of type I interferon responses. *Nature Reviews Immunology*. 2013;14(1):36-49. doi: 10.1038/nri3581.
64. Crow MK. Advances in understanding the role of type I interferons in systemic lupus erythematosus. *Current opinion in rheumatology*. 2014;26(5):467-74. doi: 10.1097/BOR.000000000000087. PubMed PMID: 25010440; PubMed Central PMCID: PMC4280994.
65. López de Padilla CM, Niewold TB. The type I interferons: Basic concepts and clinical relevance in immune-mediated inflammatory diseases. 2016;576(1 Pt 1):14-21. doi: 10.1016/j.gene.2015.09.058. PubMed PMID: 26410416; PubMed Central PMCID: PMC4666791.
66. Casanova J-L. Severe infectious diseases of childhood as monogenic inborn errors of immunity. *Proceedings of the National Academy of Sciences*. 2015;112(51):E7128-37. doi:

10.1073/pnas.1521651112. PubMed PMID: 26621750; PubMed Central PMCID:  
PMCPMC4697435.

67. Casanova J-L, Abel L. The Genetic Theory of Infectious Diseases: A Brief History and Selected Illustrations. *Annual Review of Genomics and Human Genetics*. 2013;14(1):215-43. doi: 10.1146/annurev-genom-091212-153448.

68. Fodil N, Langlais D, Gros P. Primary Immunodeficiencies and Inflammatory Disease: A Growing Genetic Intersection. *Trends in immunology*. 2016;37(2):126-40. doi: 10.1016/j.it.2015.12.006.

69. Bumann D. Heterogeneous Host-Pathogen Encounters: Act Locally, Think Globally. *Cell host & microbe*. 2015;17(1):13-9. doi: 10.1016/j.chom.2014.12.006.

70. Yan BS, Pichugin AV, Jobe O, Helming L, Eruslanov EB, Gutierrez-Pabello JA, et al. Progression of pulmonary tuberculosis and efficiency of bacillus Calmette-Guerin vaccination are genetically controlled via a common sst1-mediated mechanism of innate immunity. *J Immunol*. 2007;179(10):6919-32. PubMed PMID: 17982083.

71. Pan H, Mostoslavsky G, Eruslanov E, Kotton DN, Kramnik I. Dual-promoter lentiviral system allows inducible expression of noxious proteins in macrophages. *J Immunol Methods*. 2008;329(1-2):31-44. doi: 10.1016/j.jim.2007.09.009. PubMed PMID: 17967462; PubMed Central PMCID: PMCPMC2244810.

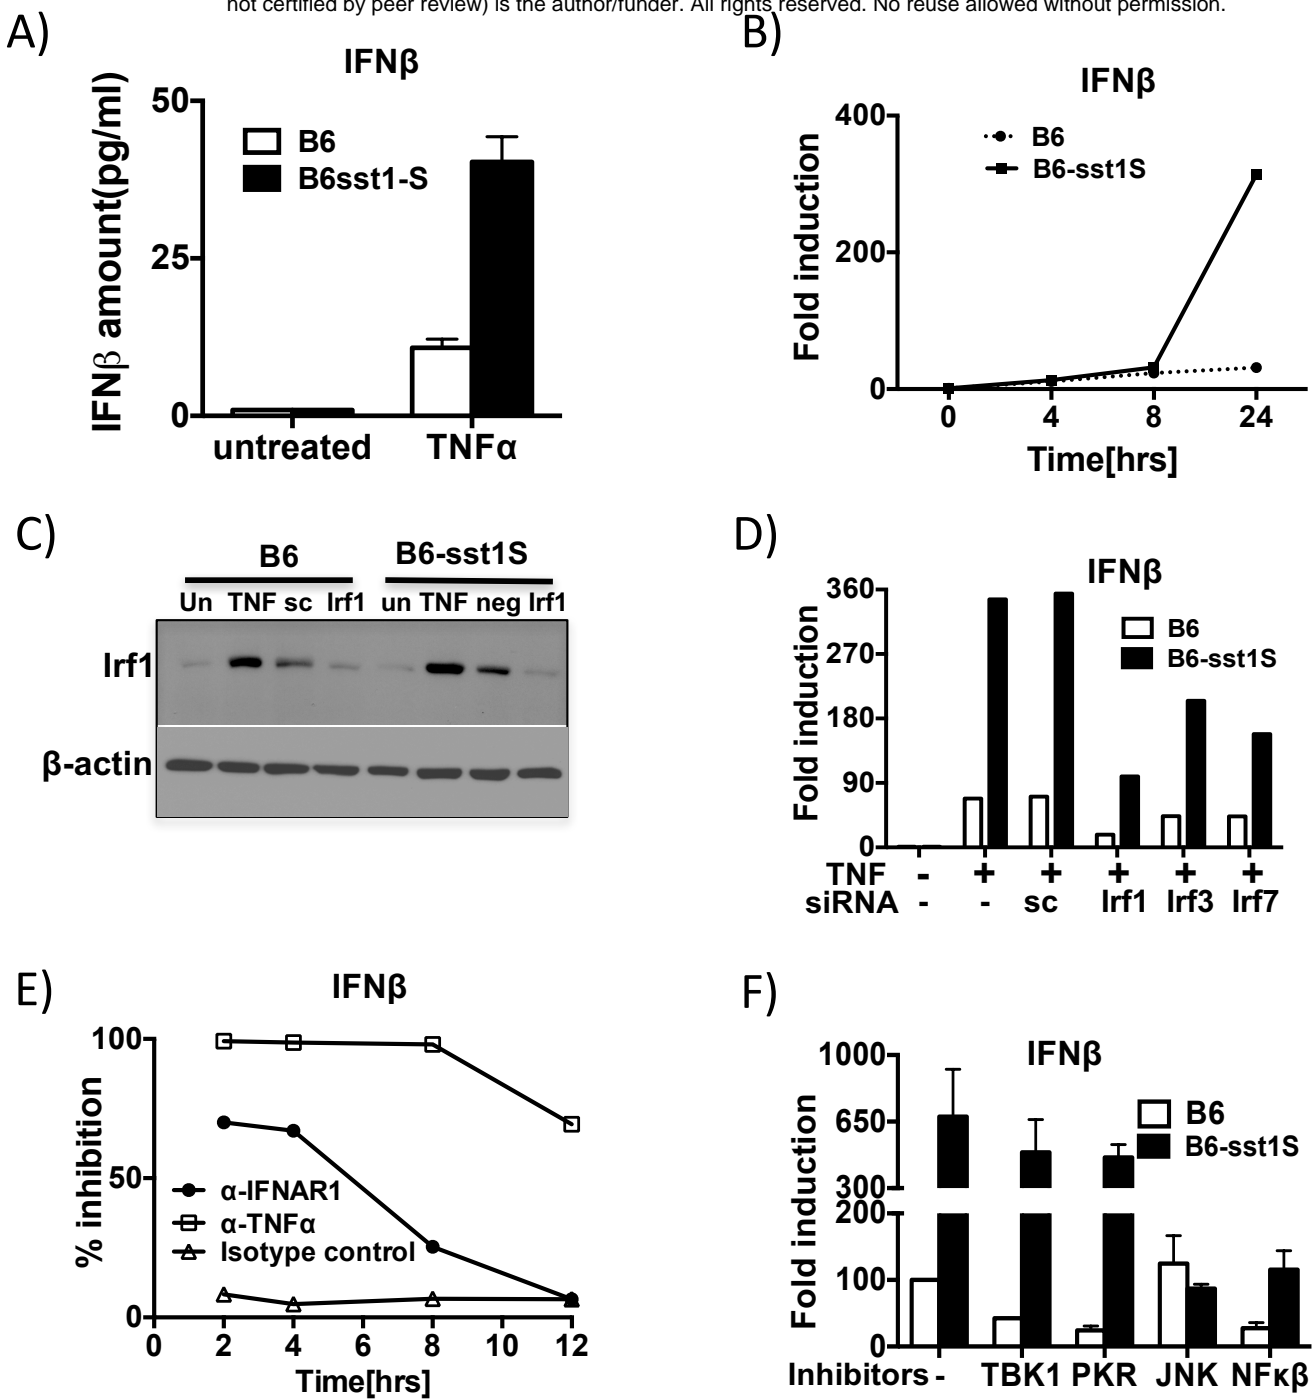

**Fig 1**



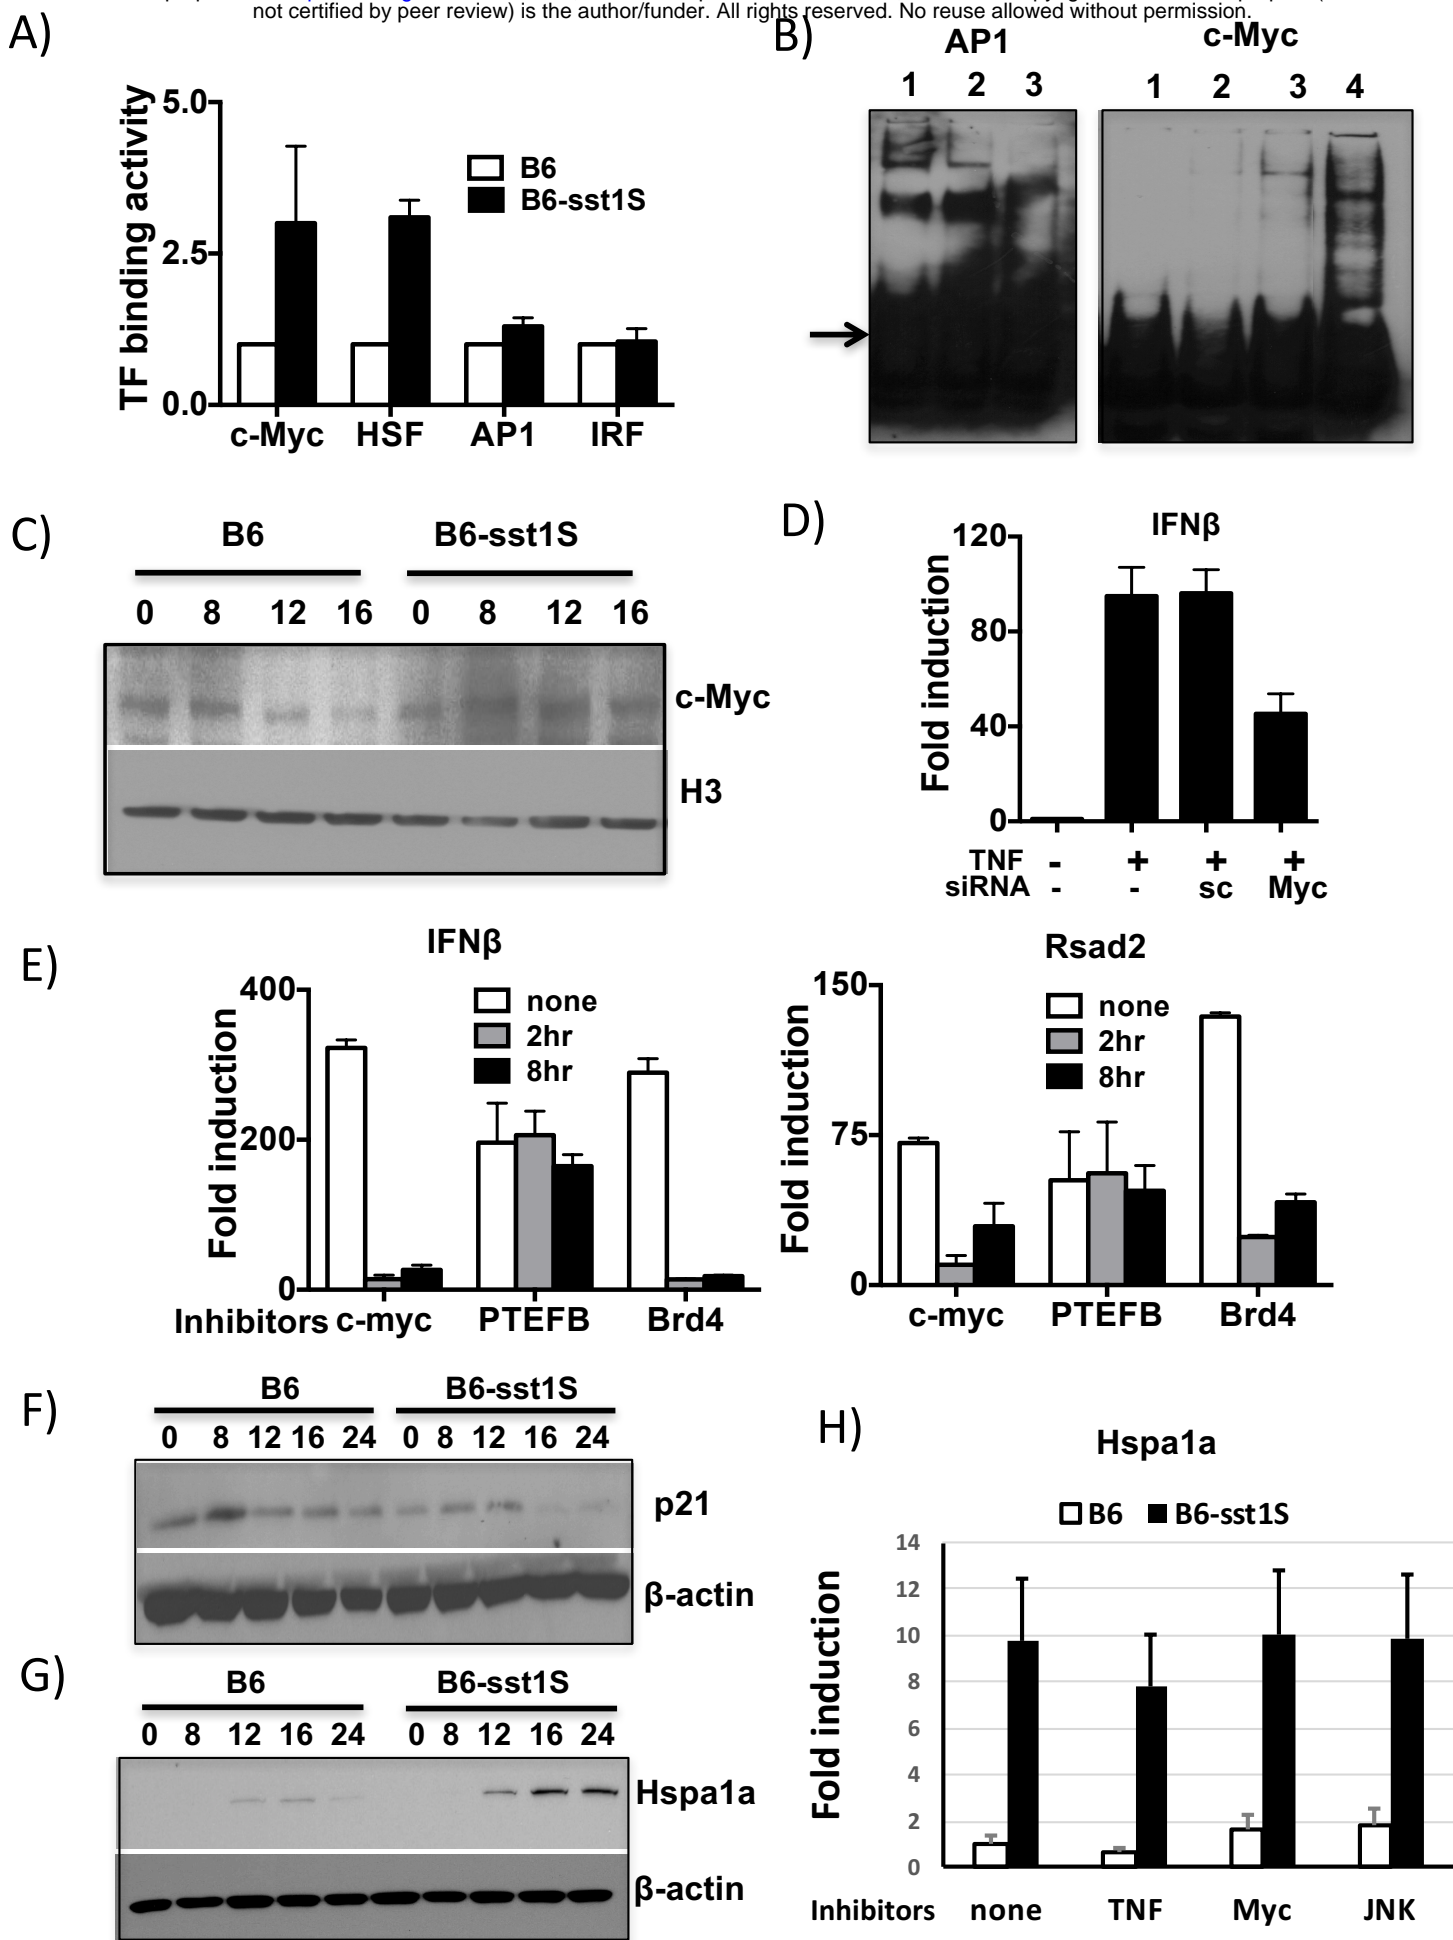

**Fig 2**

A)

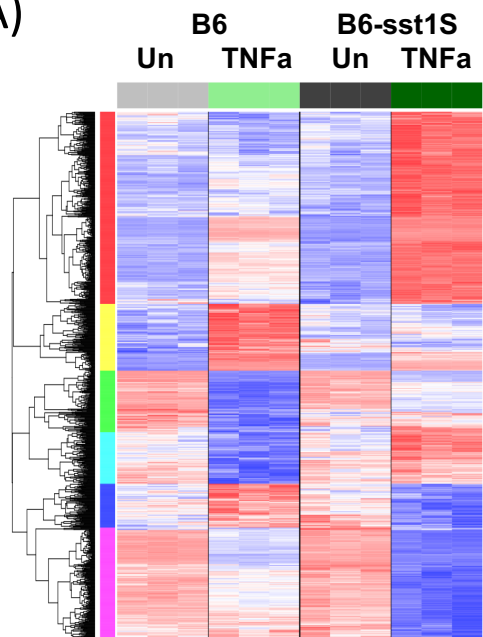

**Differentially expressed genes**

| p threshold | expected | untreated | TNFa |
|-------------|----------|-----------|------|
| 0.05        | 1260     | 1741      | 4918 |
| 0.01        | 252      | 453       | 2296 |
| 0.005       | 126      | 231       | 1628 |
| 0.001       | 25       | 42        | 592  |

**Gene Set Enrichment Analysis**

**B6-sst1S UP**

REACTOME\_INTERFERON\_SIGNALING  
 REACTOME\_ANTIVIRAL\_MECHANISM\_BY\_IFN\_STIMULATED\_GENES  
 KEGG\_CYTOSOLIC\_DNA\_SENSING\_PATHWAY  
 JAK\_STAT\_CASCADE  
 REACTOME\_TRANSPORT\_OF\_MATURE\_TRANSCRIPT\_TO\_CYTOPLASM  
 REACTOME\_METABOLISM\_OF\_NON\_CODING\_RNA  
 KEGG\_SPLICEOSOME  
 REACTOME\_MRNA\_PROCESSING  
 RNA\_SPLICINGVIA\_TRANSESTERIFICATION\_REACTIONS  
 REACTOME\_TRANSPORT\_OF\_RIBONUCLEOPROTEINS\_INTO\_THE\_HOST\_NUCLEUS  
 REACTOME\_CIRCADIAN\_CLOCK  
 HORMONE\_RECEPTOR\_BINDING  
 BIOCARTA\_RARRXR\_PATHWAY  
 N\_ACETYLTRANSFERASE\_ACTIVITY  
 POSITIVE\_REGULATION\_OF\_TRANSCRIPTION

**B6-sst1S DOWN**

KEGG\_BIOSYNTHESIS\_OF\_UNSATURATED\_FATTY\_ACIDS  
 MITOCHONDRION  
 REACTOME\_SPHINGOLIPID\_METABOLISM  
 REACTOME\_LYSOSOME\_VESICLE\_BIOGENESIS  
 KEGG\_RIBOSOME  
 REACTOME\_TRIGLYCERIDE\_BIOSYNTHESIS  
 REACTOME\_PEPTIDE\_CHAIN\_ELONGATION  
 REACTOME\_GLYCOSPHINGOLIPID\_METABOLISM  
 MITOCHONDRIAL\_INNER\_MEMBRANE  
 KEGG\_STEROID\_BIOSYNTHESIS  
 REACTOME\_CHOLESTEROL\_BIOSYNTHESIS  
 KEGG\_OXIDATIVE\_PHOSPHORYLATION  
 REACTOME\_RESPIRATORY\_ELECTRON\_TRANSPORT

B)

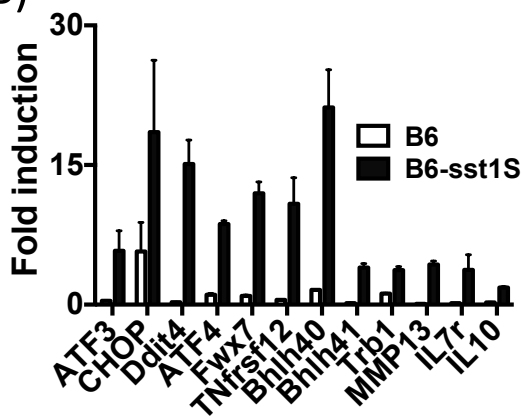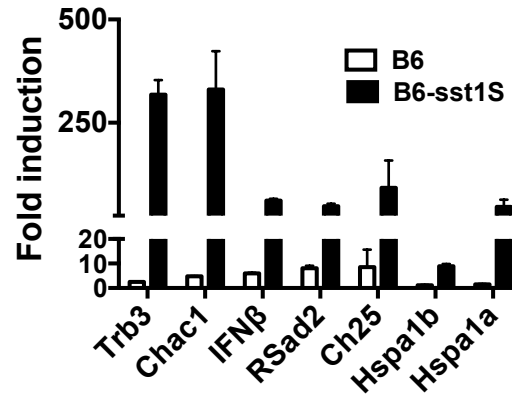

C)

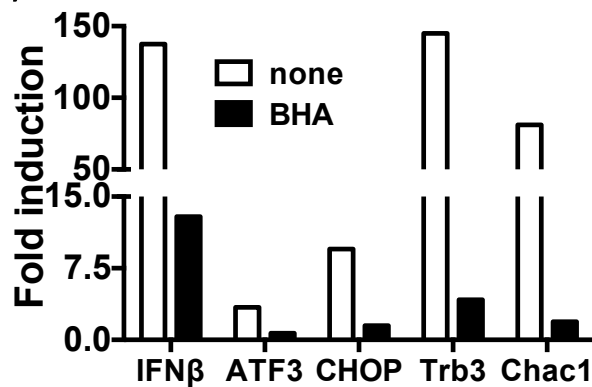

D)

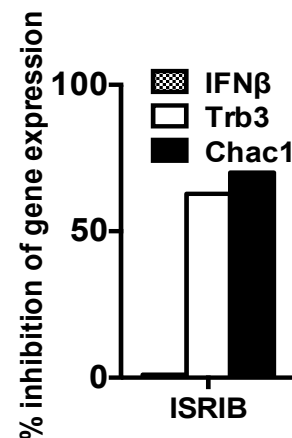

**Fig 3**

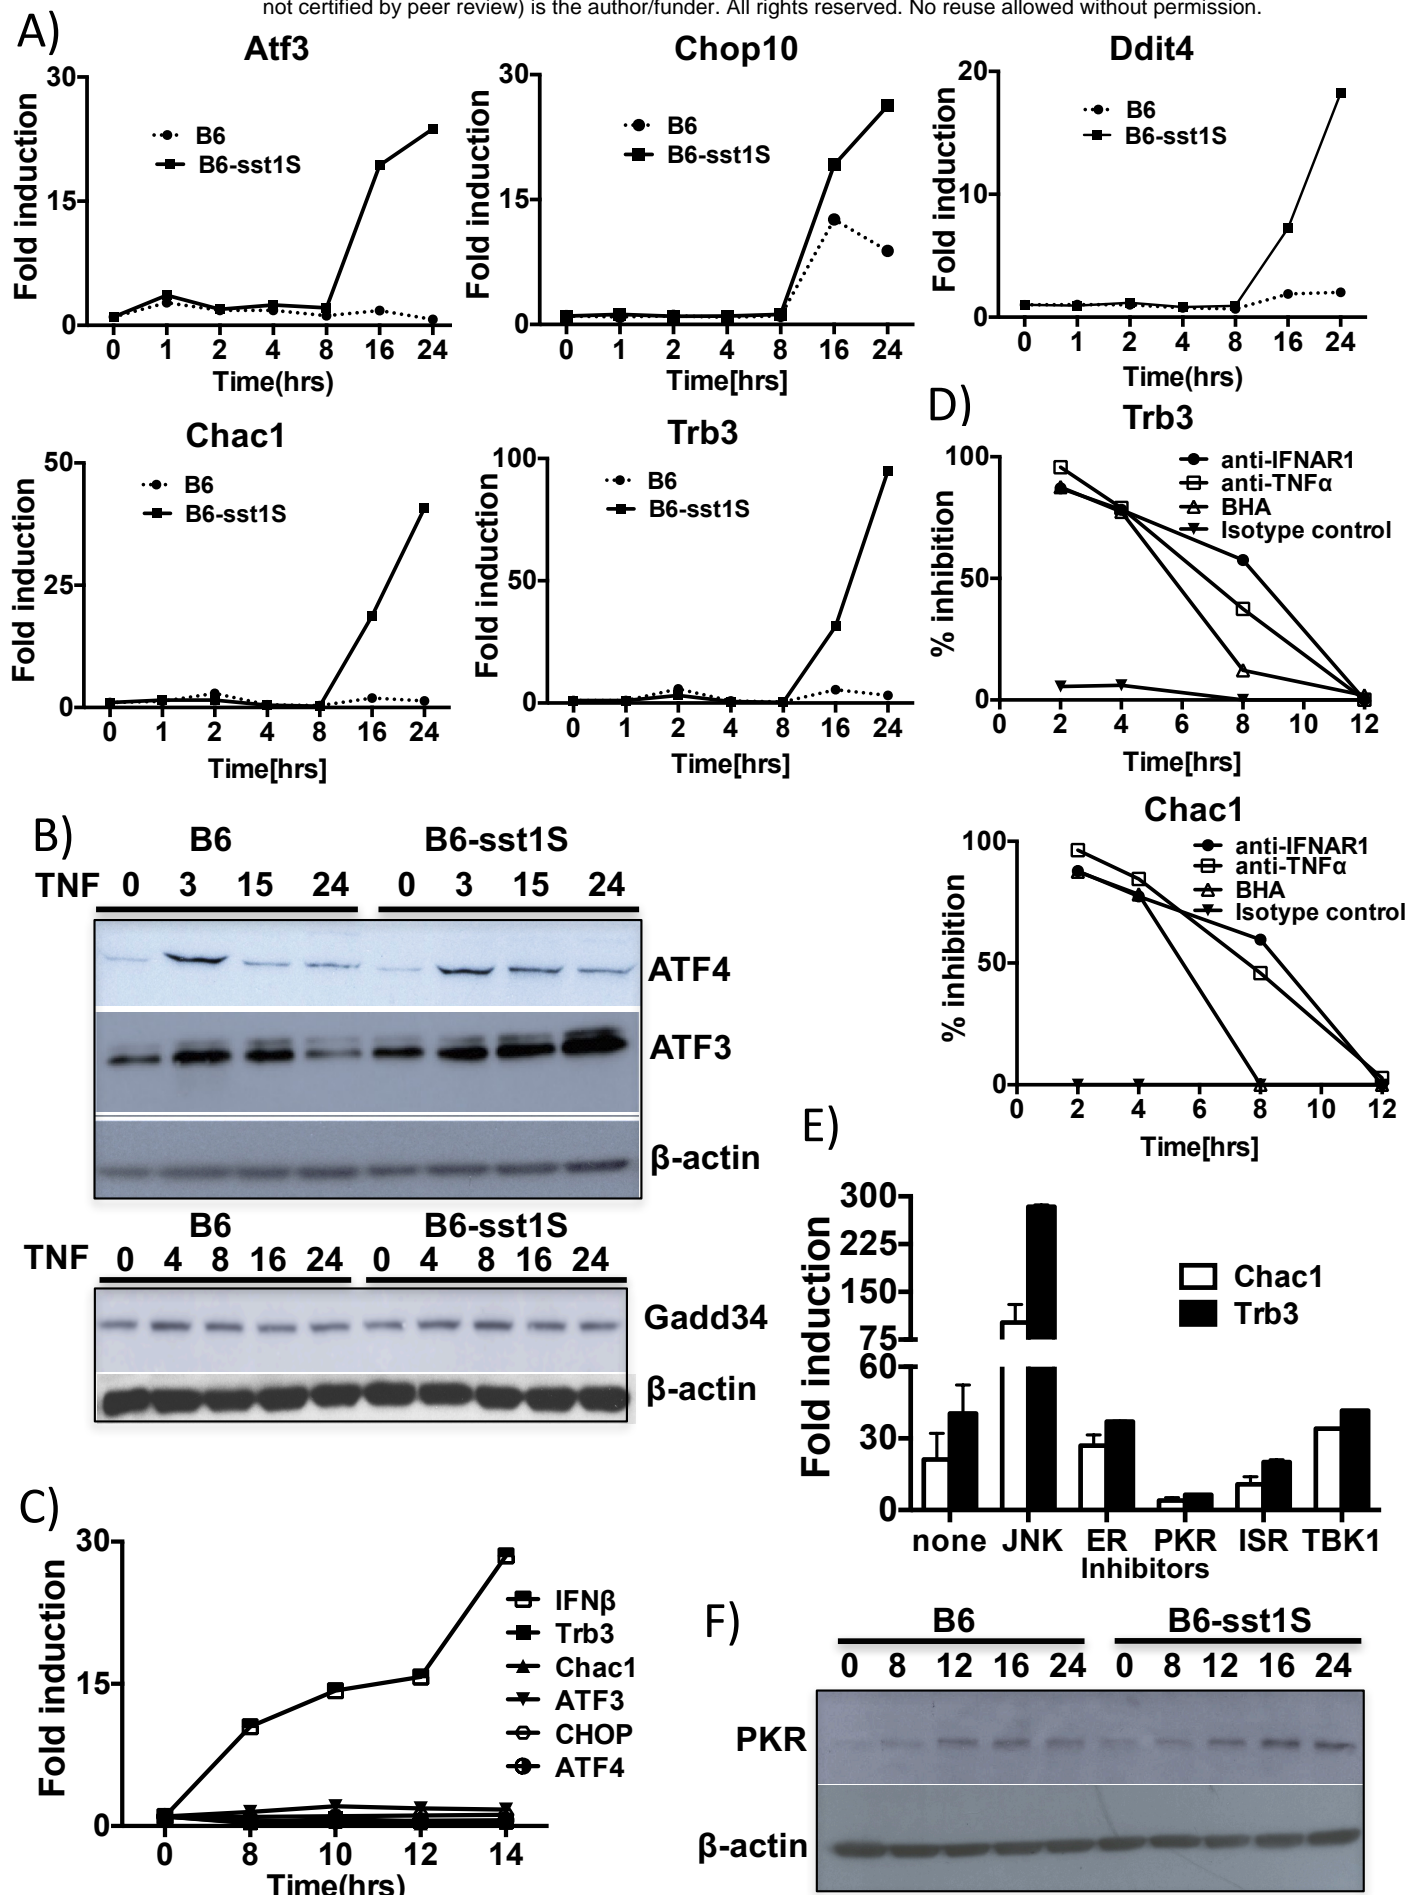

**Fig 4**

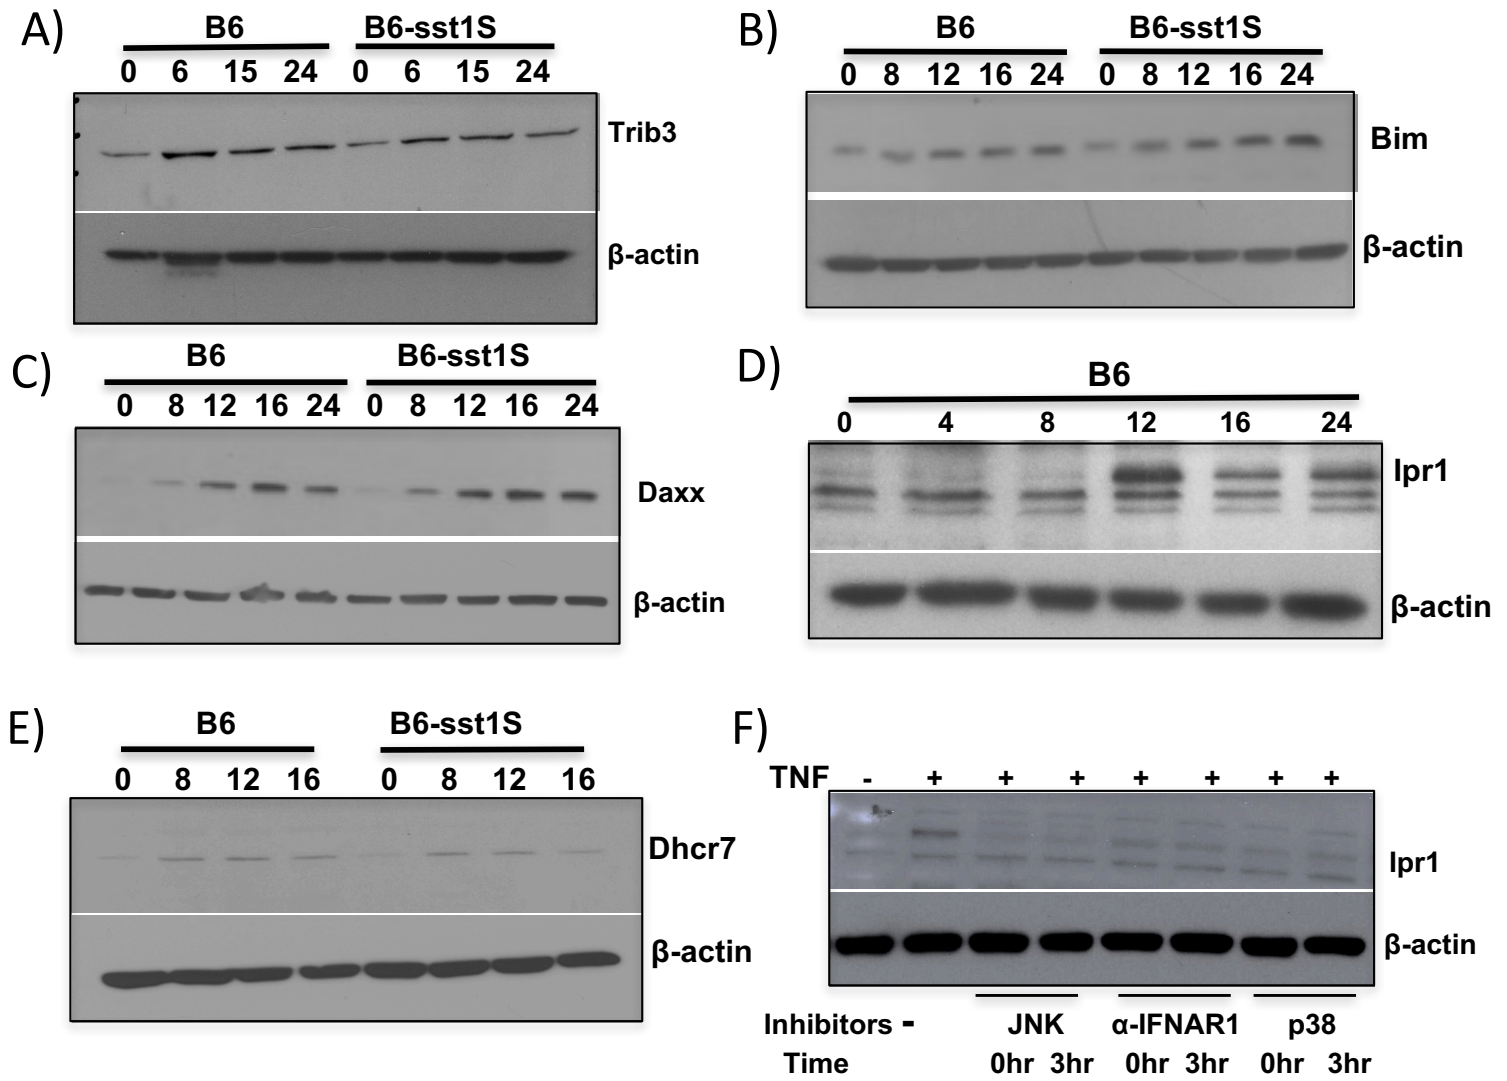

**Fig 5**

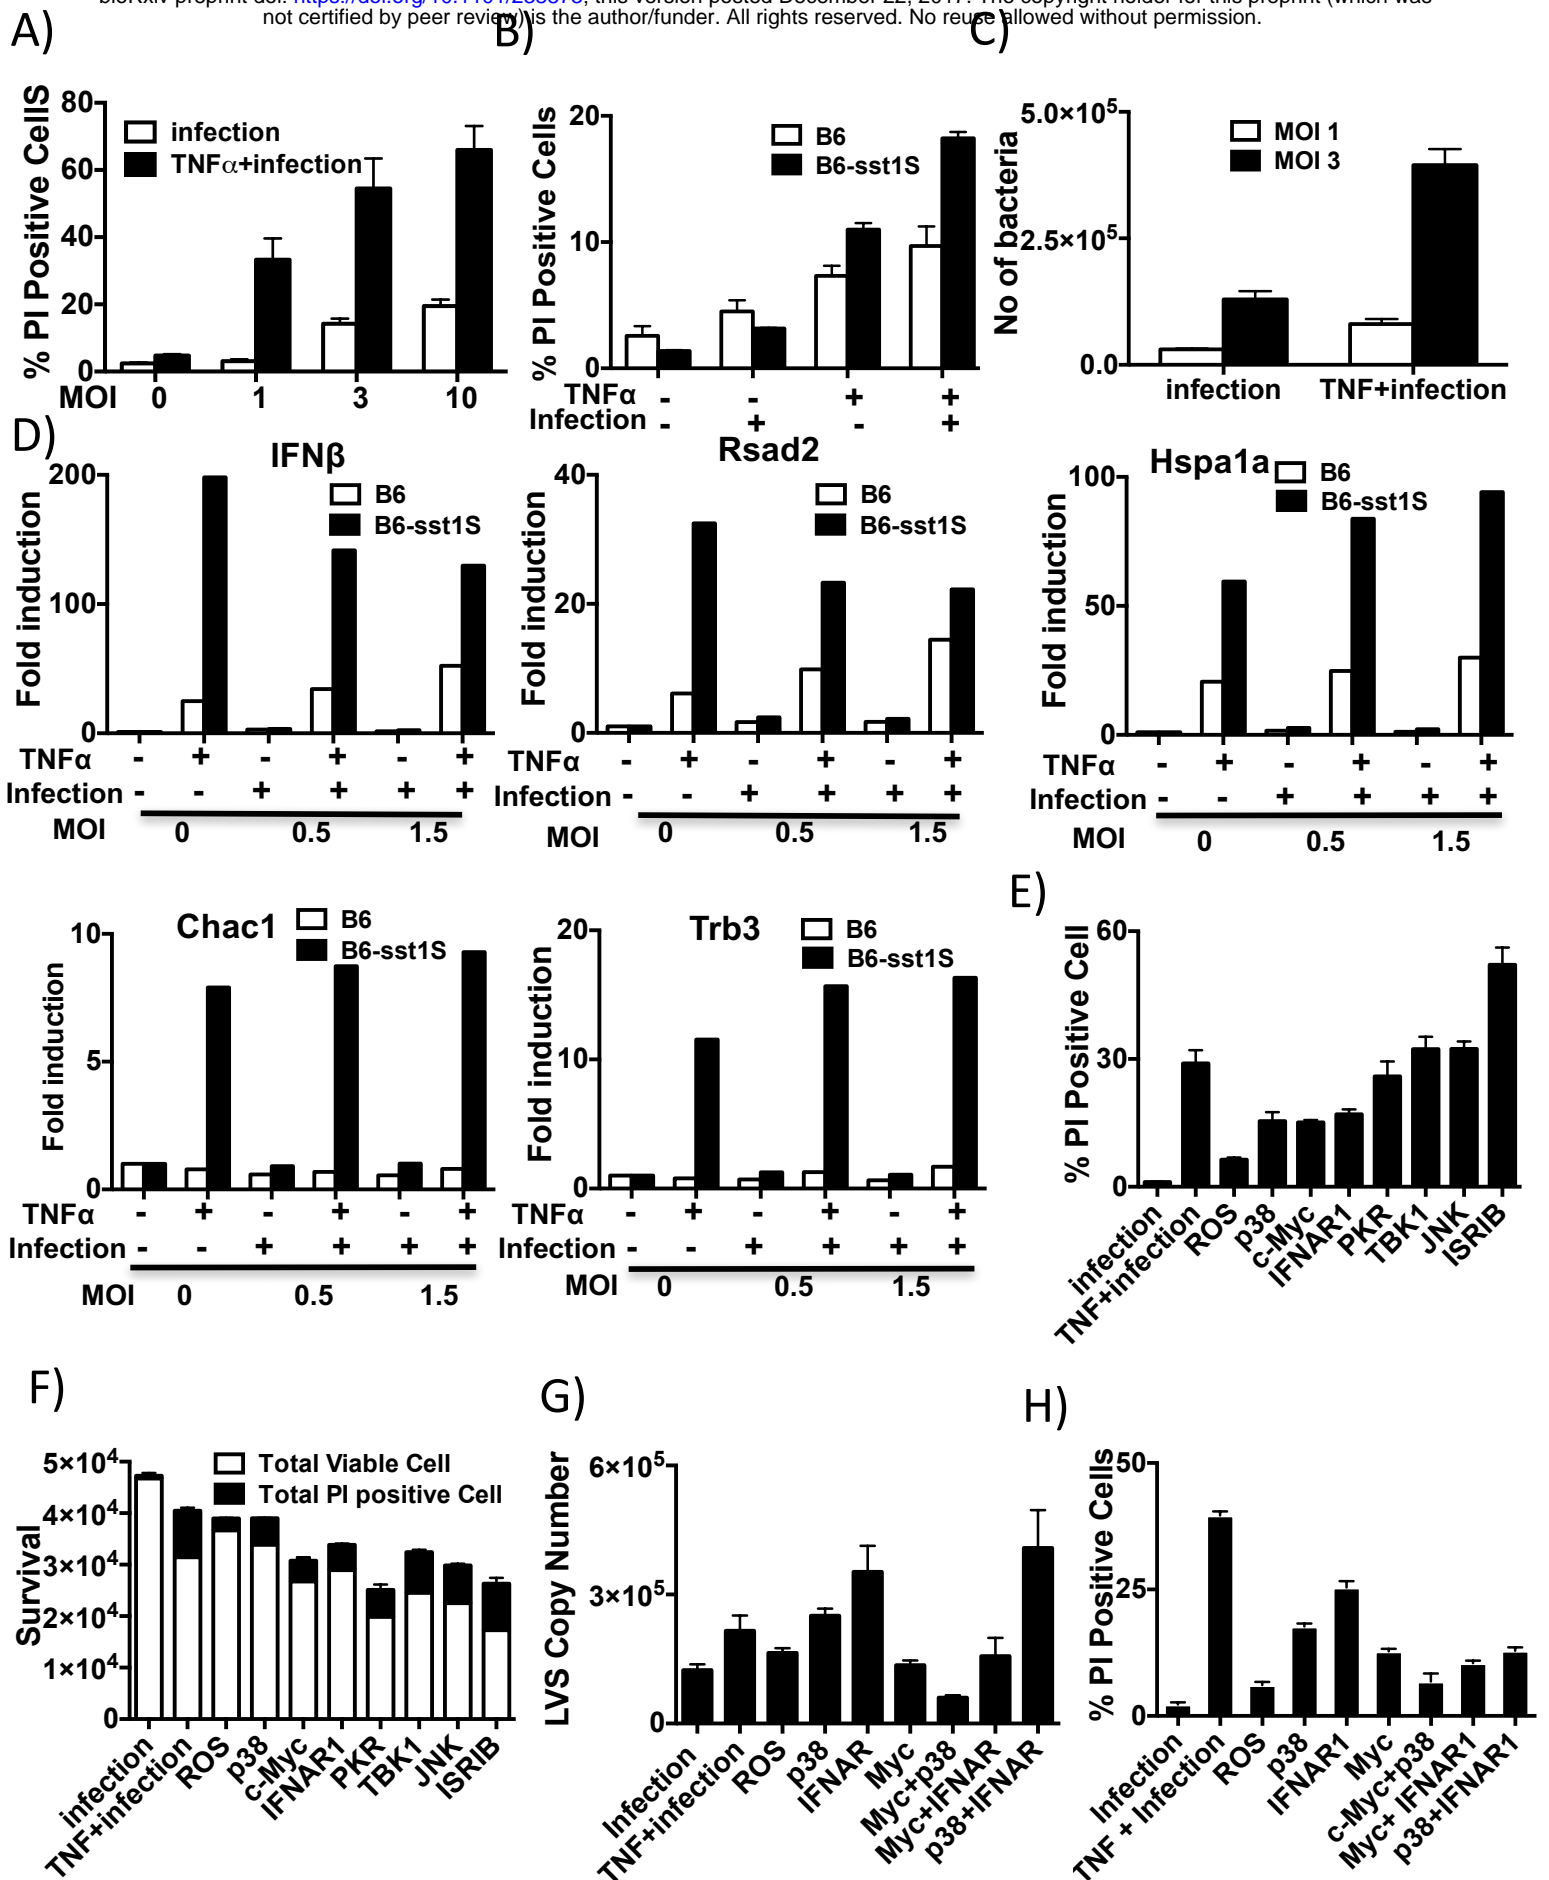

**Fig 6**

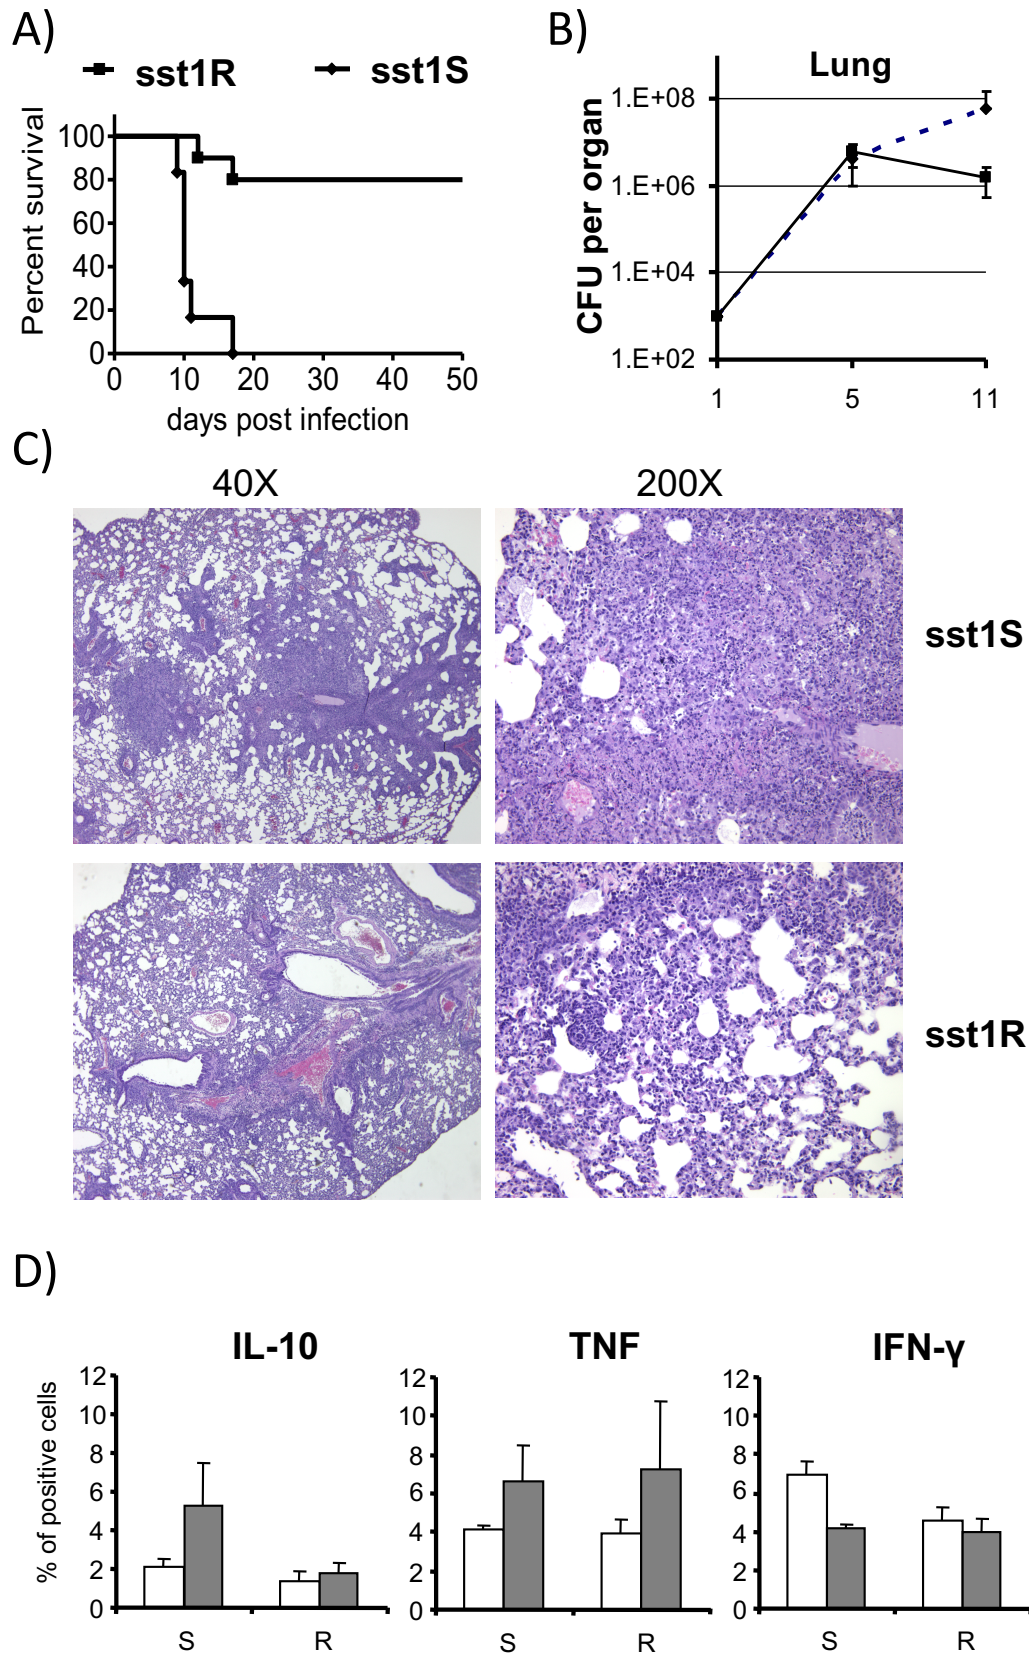

**Fig 7**
